# Sensory coding and contrast invariance emerge from the control of plastic inhibition over excitatory connectivity

René Larisch<sup>1,\*</sup>, Lorenz Gönner<sup>1,2</sup>, Michael Teichmann<sup>1</sup> and Fred H. Hamker<sup>1,3,\*\*</sup>

May 11, 2020

<sup>1</sup> *TU Chemnitz, Dept. of Computer Science, Artificial Intelligence*

<sup>2</sup> *TU Dresden, Faculty of Psychology, Lifespan Developmental Neuroscience*

<sup>3</sup> *Bernstein Center Computational Neuroscience Berlin*

\* *rene.larisch@informatik.tu-chemnitz.de*

\*\* *fred.hamker@informatik.tu-chemnitz.de*

Visual stimuli are represented by a highly efficient code in the primary visual cortex, but the development of this code is still unclear. Two distinct factors control coding efficiency: Representational efficiency, which is determined by neuronal tuning diversity, and metabolic efficiency, which is influenced by neuronal gain. How these determinants of coding efficiency are shaped during development, supported by excitatory and inhibitory plasticity, is only partially understood. We investigate a fully plastic spiking network of the primary visual cortex, building on phenomenological plasticity rules. Our results show that inhibitory plasticity is key to the emergence of tuning diversity and accurate input encoding. Additionally, inhibitory feedback increases the metabolic efficiency by implementing a gain control mechanism. Interestingly, this led to the spontaneous emergence of contrast-invariant tuning curves. Our findings highlight the role of interneuron plasticity during the development of receptive fields and in shaping sensory representations.

## 23 **1 Introduction**

24 The primary visual cortex (V1) represents visual input stimuli in a highly efficient manner (Froudarakis  
25 et al., 2014; Dadarlat & Stryker, 2017). Recent research has identified two distinct factors underlying  
26 the efficiency of visual representations: First, representational efficiency in terms of absolute information  
27 content, which is mainly determined by the receptive field tuning diversity (Goris et al., 2015). Second,  
28 metabolic efficiency in terms of the number of spikes required to represent a specific input stimulus. This  
29 aspect is strongly influenced by gain control mechanisms caused by inhibitory feedback processing (Carvalho  
30 & Buonomano, 2009; Isaacson & Scanziani, 2011). How these determinants of coding functionality are  
31 shaped during development is only partially understood. While it has long been known that excitatory  
32 plasticity is necessary for the development of an accurate and efficient input representation (Olshausen &  
33 Field, 1996; Bell & Sejnowski, 1997; Zylberberg et al., 2011), there has recently been growing interest in  
34 the role of inhibitory plasticity, fueled by recent studies demonstrating plasticity at inhibitory synapses  
35 (Khan et al., 2018). As the synaptic plasticity of inhibitory interneurons in V1 likely exerts strong effects  
36 on the outcome of excitatory plasticity (Wang & Maffei, 2014), complex circuit-level interactions occur  
37 between both types of plasticity. This notion has received further support based on recent theoretical  
38 studies (Mongillo & Loewenstein, 2018). Above all, these findings raise the question of how excitatory  
39 and inhibitory plasticity can cooperate to enable the development of an efficient stimulus code.

40 Network models have proposed neural-level mechanisms of sparse code formation (Olshausen & Field,  
41 1996) based on Hebbian plasticity. However, these models typically rely on simplified learning dynamics  
42 (Savin et al., 2010; Zylberberg et al., 2011; King et al., 2013) or consider plasticity only at a subset of  
43 projections in the network (Sadeh et al., 2015; Miconi et al., 2016), not addressing the development of  
44 feedback-based gain control. As such, it remains unclear how functional input encoding can emerge in a  
45 more detailed model of V1 circuit development.

46 We here propose that a single underlying mechanism - the influence of inhibitory plasticity on excitatory  
47 plasticity - is sufficient to explain both, the observed feed-forward tuning and neuronal gain-control  
48 by feedback processing, and we investigate this influence in a spiking network model of V1 layer 4.  
49 Our key finding is that inhibitory plasticity supports the joint development of feed-forward tuning and  
50 balances inhibitory feedback currents. Importantly, this balance leads to the spontaneous emergence of  
51 contrast-invariant tuning curves, as an inherent phenomenon of the network and its plasticity dynamics.  
52 Our results link both representational efficiency and metabolic efficiency to synaptic plasticity mechanisms.

## 53 2 Results

54 To investigate the interaction between excitatory and inhibitory plasticity, we designed a spiking network  
55 model of V1-layer 4 consisting of an excitatory and inhibitory population, stimulated with natural image  
56 patches (**Fig. 1a**) (see **Methods**). The circuit of our neuronal network implements both feed-forward  
57 and feedback inhibition, in agreement with anatomical findings (Isaacson & Scanziani, 2011). Although  
58 different kinds of inhibitory neurons have been found in the neocortex (Markram et al., 2004; Priebe &  
59 Ferster, 2008), our network contains only one population of inhibitory neurons, as a simplification. The  
60 size of the inhibitory population was chosen to match the 4:1 ratio between excitatory and inhibitory  
61 neurons found in striate cortex (Beaulieu et al., 1992; Markram et al., 2004; Potjans & Diesmann, 2014).  
62 The plasticity of the excitatory synapses follows the voltage-based triplet spike timing-dependent plasticity  
63 (STDP) rule proposed by Clopath et al. (2010). The strength of the inhibitory synapses changes according  
64 to the symmetric inhibitory STDP rule described by Vogels et al. (2011), which achieves homeostasis  
65 by maintaining a constant postsynaptic firing rate ( $\rho$ ). This allows us to vary the strength of inhibitory  
66 synapses in the network, to investigate how the balance between excitation and inhibition influences the  
67 emergence of neuronal gain-control and feed-forward tuning.

68 For this purpose, we compare a network with a 2 : 1 ratio of excitation to inhibition to a model version  
69 with a 3 : 1 excitation to inhibition ratio, averaged on natural scene patches (**Fig. 1b**). Additionally,  
70 we blocked inhibitory synapses after learning to investigate the dynamic effects of inhibition on network  
71 coding (called *blockInh*) Each of the three model configurations was repeated 10 times, initialized with  
72 randomly chosen weight values, to test the stability and reproducibility of the observed outcomes. To  
73 analyze the influence of inhibition during learning after all, our fourth model configuration contains no  
74 inhibitory synapses (called *noInh* model).

75  
76 **Emergence of diversely tuned receptive fields** The receptive fields of V1 simple cells are often described  
77 by Gabor functions (Jones & Palmer, 1987a; Ringach, 2002; Spratling, 2012). We observe the emergence  
78 of Gabor-like receptive fields in our network for the excitatory and inhibitory population with the spike  
79 triggered average method (STA, see **Methods**). Without inhibition, most of the receptive fields have a  
80 similar orientation and position (**Fig. 2a**). In contrast, the presence of inhibition during learning resulted  
81 in a higher diversity of receptive fields with a more complex structure for the excitatory population (**Fig.**  
82 **2b**) and the inhibitory population (**Fig. 2c**). The measured receptive fields showed a strong tendency for  
83 weight values to cluster around the minimum or the maximum value. This is a known characteristic of  
84 the learning rule chosen for excitatory synapses, which enforces strong synaptic competition (Clopath et  
85 al., 2010; Miconi et al., 2016).

86 We fitted the learned receptive fields with Gabor functions (see Methods) and calculated the normalized  
87 mean-square error (NMSE, see **Eq. 14**) to quantify the fit (Spratling, 2012). Fits with an error greater  
88 than 0.5 were excluded from further evaluations about spatial properties, which occurred for around 25%  
89 of neurons for the *EI2/1* model, and around 2% of all neurons for the *noInh* model, averaged across 10  
90 runs for every network configuration.

91 A broader range of orientations emerged in the networks with inhibition (**Fig. 2e**). Without inhibition,  
92 most receptive fields converge to a preferred orientation around  $0^\circ$  or  $180^\circ$  (**Fig. 2d**). In the model with  
93 weaker inhibition (*EI3/1*), receptive fields converge to a very similar orientation distribution than in the  
94 *EI2/1* model (see Supplementary **S1**). In addition, the inhibitory cells in the *EI2/1* models also become  
95 selectively tuned, with a clear preference at  $0^\circ$  and  $180^\circ$  (**Fig. 2f**). This is in line with recent experi-  
96 ments on mouse V1, in which tuned inhibition is found (Bock et al., 2011; Hofer et al., 2011; Liu et al., 2011).

97

98 **Emergence of structured feed-forward and recurrent connectivity** As both, the excitatory and in-  
99 hibitory cells in our network developed a tuning for orientation and position, we expected that their  
100 modifiable synaptic connections developed a specific pattern reflecting activity correlations (King et al.,  
101 2013; Sadeh et al., 2015). Our analysis confirmed that excitatory neurons developed strong connections to  
102 inhibitory neurons with similar orientation tuning (**Fig. 3a**, top). Inhibitory weights to the excitatory  
103 layer showed a similar pattern, although with somewhat reduced specificity (**Fig. 3a**, bottom). This  
104 implements an indirect inter-neuron connection between two excitatory neurons via mutually connected  
105 inhibitory neurons, to inhibit each other maximally. The development of strong recurrent inhibitory  
106 synapses between similarly tuned inhibitory cells can be observed as well (**Fig. 3b**).

107

108 **Inhibition controls response decorrelation** We observed that the different levels of inhibition in the  
109 *EI2/1* and *EI3/1* models led to similar orientation distributions. To investigate if response correlations  
110 between neurons only depend on the orientation similarity or whether lateral inhibition has an additional  
111 decorrelation effect (as mentioned in previous modeling approaches of Wiltschut & Hamker (2009); Savin et  
112 al. (2010); Zylberberg et al. (2011); King et al. (2013)), we analyzed the development of correlations during  
113 receptive field learning (**Fig. 4a**). During the first 250,000 of all 400,000 input stimuli, a weak reduction  
114 of the correlation can be observed in the *noInh* model. The *EI2/1* model showed a pronounced decrease  
115 of correlations across learning, with the highest reduction occurring in the early phase of learning showing  
116 the highest amount of changes of the feed-forward weights. Weaker feedback inhibition (*EI3/1* model)  
117 led to weaker decorrelation of neuronal activity. This confirms that the level of inhibition determines the  
118 degree of decorrelation of pairwise responses.

119

120 Smith & Kohn (2008) recorded the neuronal activity in V1 of macaque monkeys during the presentation  
121 of drifting sinusoidal gratings and reported a dependence of pairwise response correlations on orientation  
122 tuning similarity. We performed a similar analysis of our model data, to analyze the effect of feedback  
123 inhibition on the response correlation with respect to the orientation selectivity. We sorted all cell pairs by  
124 similarity, grouped them into 30 equally-spaced bins, and averaged their response correlation values within  
125 each bin, based on natural scene stimuli (details see **Methods**) (**Fig. 4b**). Without inhibition, we observed  
126 a mean response correlation of  $\approx 0.95$  for cell pairs with highly similar receptive fields. With inhibition, this  
127 value dropped to  $\approx 0.8$ . By contrast, cell pairs with dissimilar receptive fields showed average correlation  
128 values of around 0.4 for the *noInh* and the *blockInh* model. Here, inhibitory processing substantially  
129 reduced the mean correlation to near zero-values for the *EI2/1* model. A comparison between the *EI2/1*  
130 model and its counterpart with blocked inhibition shows that dissimilarly tuned neuron pairs are more  
131 strongly decorrelated than pairs with highly similar tuning. At a first glance, this pattern contrasts with  
132 the emergent connectivity structure: The connectivity pattern favors strong mutual inhibitory connections  
133 between inhibitory neurons which receive projections from (and project back to) excitatory neurons with  
134 similar tuning, creating strong reciprocal inhibition (**Fig. 3a** and **Fig. 3b**). However, our observation of  
135 target-specific decorrelation is best understood by considering that correlated mean responses can arise  
136 both through a similarity of tuning and through unspecific baseline activity. Natural image patches are  
137 likely to evoke broad excitation among many cells, similar to sinusoidal grating stimuli. The correlation  
138 between dissimilarly tuned neurons is most likely caused by the activity baseline, which is strongly reduced  
139 by inhibition. Besides, similarly tuned cells will retain strongly overlapping tuning curves even after reduc-  
140 tion of unspecific activity, associated with strong correlation of their mean response (Averbeck et al., 2006).

141

142 **Inhibitory feedback shapes tuning curves** To quantify the effect of inhibition on the magnitude of  
143 individual neuronal responses, we measured orientation tuning curves of each neuron by sinusoidal gratings.  
144 For all approaches and model variants, the maximum firing rate in the input was set to  $\approx 85Hz$  to obtain  
145 sufficiently high activity levels. We observed high baseline and peak activity in both model variants  
146 without inhibition (**Fig. 5a**). However, activity levels in the *blockInh* model were lower than in the  
147 *noInh* model, likely owing to its smaller and more dispersed receptive fields. As expected, the model  
148 with active inhibitory feedback showed a strong reduction of firing rates. To obtain a measure of tuning  
149 sharpness, we next estimated the orientation bandwidth (OBW) of the excitatory population, based on the  
150 measured tuning curves. As expected, and consistent with previous observations (Isaacson & Scanziani,  
151 2011; Stringer et al., 2016), we observed a sharpening effect through inhibition (**Fig. 5b**).

152

153 **Spontaneous emergence of contrast-invariant tuning curves** Besides the sharpening of tuning curves,  
154 previous models suggest a role of inhibition in the invariance to input contrast changes (Troyer et al.,  
155 1998; Ferster & Miller, 2000; Priebe & Ferster, 2008). However, those models assume hard-wired con-  
156 nectivity, and propose push-pull or anti-phase inhibition (Troyer et al., 1998; Ferster & Miller, 2000).  
157 Contrast-invariant V1 simple cells have been found in different mammals such as, cats (Skottun et al.,  
158 1987; Finn et al., 2007) or ferrets (Alitto & Usrey, 2004), based on sinusoidal gratings with different  
159 contrast strength. We use the same approach (see **Methods**) to measure the tuning curves and calculated  
160 the averaged OBW over all excitatory cells for the different contrast levels (**Fig. 6a**). Interestingly, the  
161 OBW is constant only for the *EI2/1* model. For both models without inhibition and for the model with  
162 weaker inhibition, the OBW increases for higher input contrast values. To understand this effect, we  
163 compared the *EI2/1* with the *EI3/1* model with regard to their spike count, average membrane potential,  
164 and the average of the summed synaptic input current, for different contrast levels. At any contrast level,  
165 the activity of neurons in the *EI2/1* model remains strongly suppressed at non-preferred orientations  
166 and increases around the preferred orientation (**Fig. 7a**). By contrast, the *EI3/1* model shows increased  
167 activity for high input contrast at all orientations (**Fig. 7b**). This results in increased OBW values for  
168 higher input contrast. Interestingly, for the non-preferred orientation, the average membrane potential  
169 the *EI2/1* model is less hyperpolarized for lower contrast than for higher contrast. For higher contrast,  
170 the average membrane potential increases at the preferred orientation and is substantially stronger than  
171 for lower contrast. Both curves intersect around  $-50mV$ , close to the resting state spiking threshold  
172 ( $-50.4mV$ ) (**Fig. 7c**). This can be explained with the average input current: At higher contrast levels  
173 and non-preferred orientations, the feedback inhibitory current increases more strongly than the excitatory  
174 current and nearly compensates it (**Fig. 7e** and **S3 a**), providing hyperpolarization of the membrane  
175 potential. This compensation of excitation decreases around the preferred stimulus, where the membrane  
176 potential exceeds the spiking threshold. In comparison, the membrane potential for the *EI3/1* model  
177 increases proportionally with the total input current caused by higher input contrast (**Fig. 7d**, **Fig. 7f**  
178 and **S3 b**). This suggests that the contrast-invariant tuning of the *EI2/1* model depends on an appropriate  
179 balance between excitation and inhibition.

180  
181 Based on the observation of contrast invariant tuning curves, we conclude that feedback inhibition  
182 modulates the neuronal gain controlled by input orientation and contrast. **Fig. 6b** shows the average  
183 response gain for the excitatory population, averaged across the whole population (see **Methods** for more  
184 details). We show the response gain curves for low and high contrast stimuli. For the model with blocked  
185 inhibition (*blockInh*), the gain curve is unaffected by contrast and follows the activation function defined  
186 by the neuron model. The firing rates of the *EI2/1* model are strongly reduced relative to the *blockInh*

187 model. Further, this gain modulation is contrast-dependent, as the highest reduction of firing rates is  
188 observed for high contrast. This shows that the effect of inhibition on the neuronal gain function not only  
189 depends on the amount of excitatory input, but also on the stimulus orientation and contrast strength.

190 **Sparseness is increased by both inhibition and tuning diversity** As we observed that inhibitory pro-  
191 cessing led to an increase in the selectivity to artificial stimuli, we asked whether inhibition contributed  
192 to a sparser population code for natural images. We first compared the overall spiking behavior based  
193 on raster plots of network responses to five example image patches, for the *EI2/1* (**Fig. 8a**) and the  
194 *blockInh* model (**Fig. 8c**). The model with active inhibition showed sparser firing and a less synchronous  
195 spiking behavior than the model with blocked inhibition. Second, to quantify this effect, we measured the  
196 population sparseness for all model configurations, based on the responses to 10.000 natural image patches  
197 (**Fig. 8b**). The highest sparseness value (0.62) was observed in the *EI2/1* model, 0.54 for the *blockInh*  
198 model and the lowest sparseness value (0.43) in the *noInh* model. Interestingly, the development of a  
199 higher diversity of receptive fields had a stronger influence on the population sparseness than inhibitory  
200 processing: Sparseness values differed more strongly between the model configurations without inhibition,  
201 the *noInh* and *blockInh* model, than between the *EI2/1* and its blocked counterpart, which share the  
202 same feed-forward receptive fields.

203

204 **Metabolic efficiency benefits from feedback inhibition** The efficiency of information transmission, or  
205 metabolic efficiency, is associated with the observed increase of the population sparseness (Spanne &  
206 Jörntell, 2015). To quantify the efficiency, we calculated the mutual information between input and  
207 response (**Sec.Methods**). This analysis revealed a strong impact of inhibition on transmission efficiency  
208 (**Fig. 8d**), normalized by spike count. The *EI2/1* model shows the highest amount of information per  
209 spike (0.96 *bits/spike*). Both models without inhibition were associated with the least efficient population  
210 coding, with a lower value for the of the *blockInh* model, caused by a more diverse receptive field  
211 structure. To analyze further how the increase in information transmission was achieved, we calculated  
212 the discriminability index  $d'$  on 500 randomly chosen natural scene patches to quantify the trial-to-trial  
213 fluctuation. We observed that higher  $d'$  values were associated to both high tuning diversity and the  
214 presence of inhibition(see Supplementary **S2**). The improvement in discriminability is likely caused by a  
215 reduction of unspecific activity by inhibition, associated with more reliable stimulus representations, as  
216 observed in cat V1 (Haider et al., 2010) and mouse V1 (W. Zhu et al., 2009). In summary, our results  
217 show that the inhibitory processes in our models suppress redundant spikes which convey little information  
218 about the current stimulus (Kremkow et al., 2016).

219 **Input encoding quality benefits from plastic inhibition** A fundamental purpose of sensory systems is  
220 to provide reliable information about relevant environmental stimuli. To compare our model with existing  
221 sparse coding models, in terms of stimulus encoding, we calculated the image reconstruction error (IRE),  
222 which measures the mean-square error between the input image and its reconstruction obtained by linear  
223 decoding (see **Methods**). The *EI2/1* model with active inhibition during learning showed the lowest  
224 reconstruction error value (0.74) (**Fig. 9a**). By contrast, a substantially higher reconstruction error was  
225 observed for the *noInh* model (1.06). Blocking inhibitory currents after circuit development caused a  
226 slight increase in the IRE to a value of 0.79 for the *blockInh* model. Together, these results indicate that  
227 the diversity of receptive field shapes and orientations contribute to the average reconstruction accuracy.

228  
229 Despite our observation about the role of feedback inhibition for the emergence of tuning diversity, the  
230 necessity of plastic inhibition compared to fixed inhibition during learning remains unclear. To analyze  
231 if plastic inhibition has a measurable effect during learning, we used shuffled weight matrices from a  
232 successfully learned *EI2/1* model for all connections as a new initial condition, and deactivated plasticity  
233 selectively at specific connections for four model variations: Only in the inhibitory feedback connections  
234 (**9b 2**), in the two possible excitatory feed-forward connections to the inhibitory population (**9b 3**), and in  
235 the lateral inhibitory and excitatory to inhibitory connections (**9b 4**). To verify that learning is successful  
236 with the shuffled pre-learned weights, we trained one model variation where all connections are plastic  
237 (**9b 1**).

238 Our results show that if only the feedback inhibitory to excitatory connections are fixed, the reconstruction  
239 error increases from 0.70 (see (**9b 1**), where every connection is plastic) to 0.95 (**Fig. 9b 4**). We observe  
240 a similar error (0.92) when the excitatory connection from the LGN input to the inhibitory population is  
241 fixed (see **Fig. 9b 3**). This shows that the plasticity of both the inhibitory feedback connections and the  
242 excitatory feed-forward connection to the inhibitory population leads to a better input representation.

243 Interestingly, the reconstruction error remains small (0.71) if both, the connection from the excitatory  
244 to the inhibitory population and the lateral inhibition are fixed (see **Fig. 9b 2**). This shows that, even  
245 with fixed lateral inhibition, plasticity at the feed-forward path from LGN to inhibitory and from the  
246 inhibitory to the excitatory neurons is sufficient for the emergence of selective interneuron activity, which  
247 is essential for a reliable input representation. As an additional control to evaluate the effect of lateral  
248 inhibition, we completely deactivated the lateral inhibitory synapses during learning in a model where all  
249 other connections are plastic and measured an IRE of 0.83 (averaged across five simulations).

250 As explained above the input encoding benefits mainly from the distribution of the receptive fields.  
251 Therefore, we conclude that plastic feed-forward and feedback inhibition is essential for the process of  
252 developing receptive fields with diverse shapes and orientations, to improve input encoding.



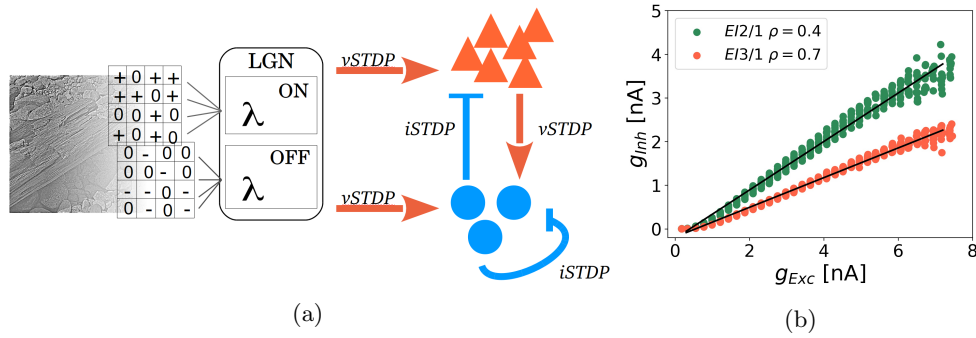

Figure 1: **Network with excitatory and inhibitory plasticity rules.** (a) Whitened image patches of size 12x12 were converted to Poisson spike trains by setting the firing rates of LGN ON- and OFF-populations to the positive and the negative part of the pixel values, respectively. Feed-forward inputs from LGN project both onto excitatory and inhibitory V1 populations, which are mutually connected. The circuit therefore implements both feed-forward and feedback inhibition. Inhibitory interneurons receive additional recurrent inhibitory connections. All excitatory synapses (orange) changes via the voltage-based STDP rule (vSTDP) (Clopath et al., 2010). All inhibitory synapses (blue) changes via the inhibitory STDP rule (iSTDP) (Vogels et al., 2011). Connectivity patterns are all-to-all. Population sizes are: LGN, 288 neurons; V1 excitatory, 144 neurons; V1 inhibitory, 36 neurons. Neurons in the LGN population showing Poisson activity and are split into ON- and OFF- subpopulations. (b): Post-synaptic target firing rate of the iSTDP rule ( $\rho$ ) controls the excitation to inhibition ratio at excitatory cells. For the EI2/1 model (green dots) a value of  $\rho = 0.4$  leads to a higher inhibitory current than  $\rho = 0.7$  for the EI3/1 model.

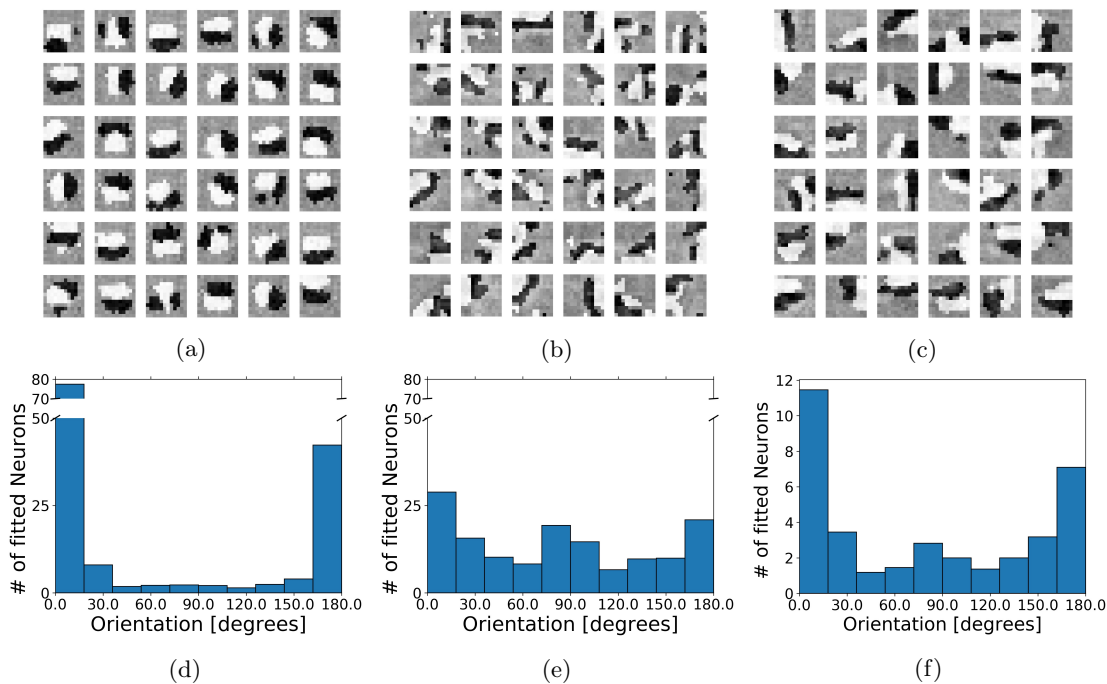

Figure 2: **Tuning diversity requires inhibition during learning.** Learned response profile of 36 excitatory neurons from the *noInh* model (a), of 36 excitatory neurons from the EI2/1 model (b), and of all 36 inhibitory neurons from the EI2/1 model (c), measured with the spike triggered average method. Lighter pixels represent positive values and darker values represent negative values. Histogram of the spatial orientation across 10 model runs, of the *noInh* model's excitatory population (d), the EI2/1 model's excitatory population (e), and the EI2/1 model's inhibitory population (f). The spatial orientation are measured by fitting the neuronal response profile with a Gabor function (see Methods).

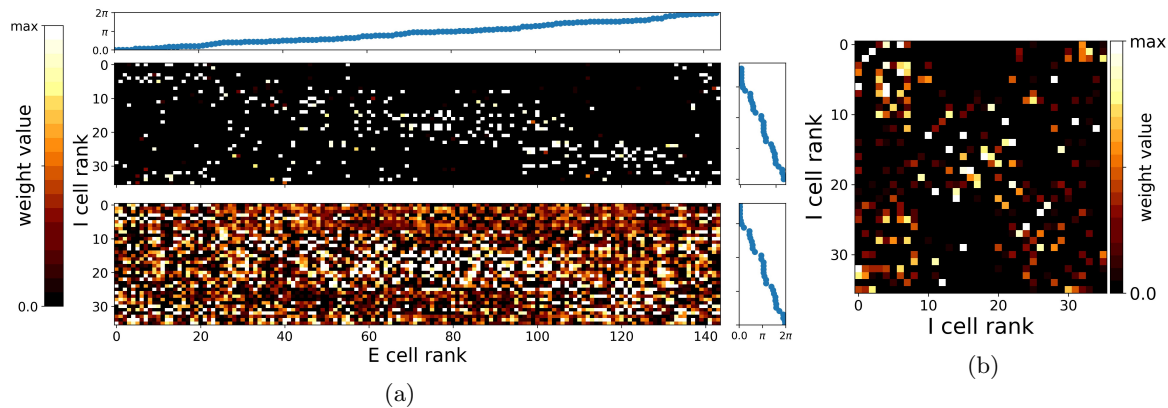

Figure 3: **Synaptic connections reflect tuning similarity.** Weight matrices from excitatory to inhibitory population (and vice versa) (a), sorted over the receptive field orientation, and for the lateral inhibition (b). **a**, Top: Weights from excitatory to inhibitory population. **a**, Bottom: Weights from inhibitory to excitatory population. For display, all weight matrices were normalized by the maximum value. All weights from the *EI2/1* model.

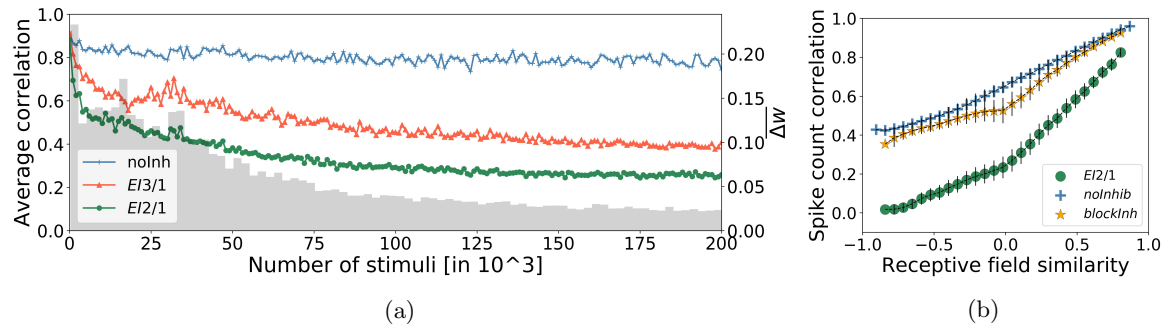

Figure 4: **Inhibitory strength influence the response decorrelation.** (a) The development of mean response correlation and weight change at the LGN excitatory synapses across learning. Stronger inhibition, in the *EI2/1* model, leads to a stronger decorrelation of the neuron responses during learning (compare green with red (*EI3/1*) line). Mean response correlation changed only very slightly without inhibition (blue line). (b) Response correlation is higher for neurons with more similar receptive fields. Blocking inhibition (yellow line) after learning reveals that. Inhibition leads to an overall decrease of the response correlation (green line).

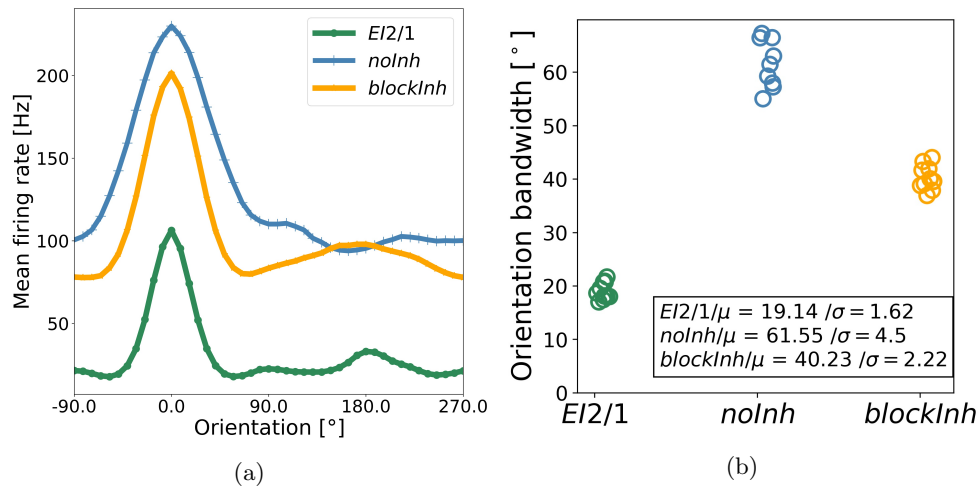

Figure 5: **Inhibition determines tuning curve sharpening.** (a) Average tuning curve of all excitatory cells in the *EI2/1* model, the corresponding counterpart with blocked inhibition, and the no inhibition model. (b) The orientation bandwidth (OBW) of cells in all three models. Every point represents the average OBW resulting from model simulation. A smaller OBW means a more sharp tuning curve.

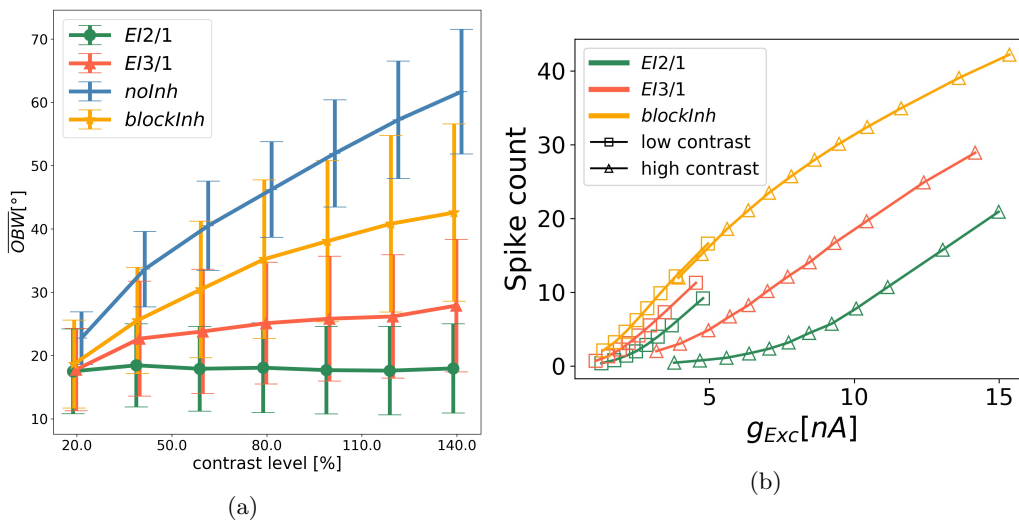

Figure 6: **Response gain control by inhibition.** (a) Mean OBW as a function of the contrast level in the input. Whiskers represent the standard deviation. Data from the *EI2/1* model (green line), *EI3/1* model (red line), *noInh* model (blue line) and *blockInh* model (orange line). (b) Spike count as a function of the excitatory input current for the *EI2/1* model (green line), the *EI3/1* model (red line) and the *blockInh* model (orange line). Data are taken from the sinusoidal tuning curve measurement, sorted ascending over the input current. Squares are data from low input contrast level and triangles are data from high input contrast level.

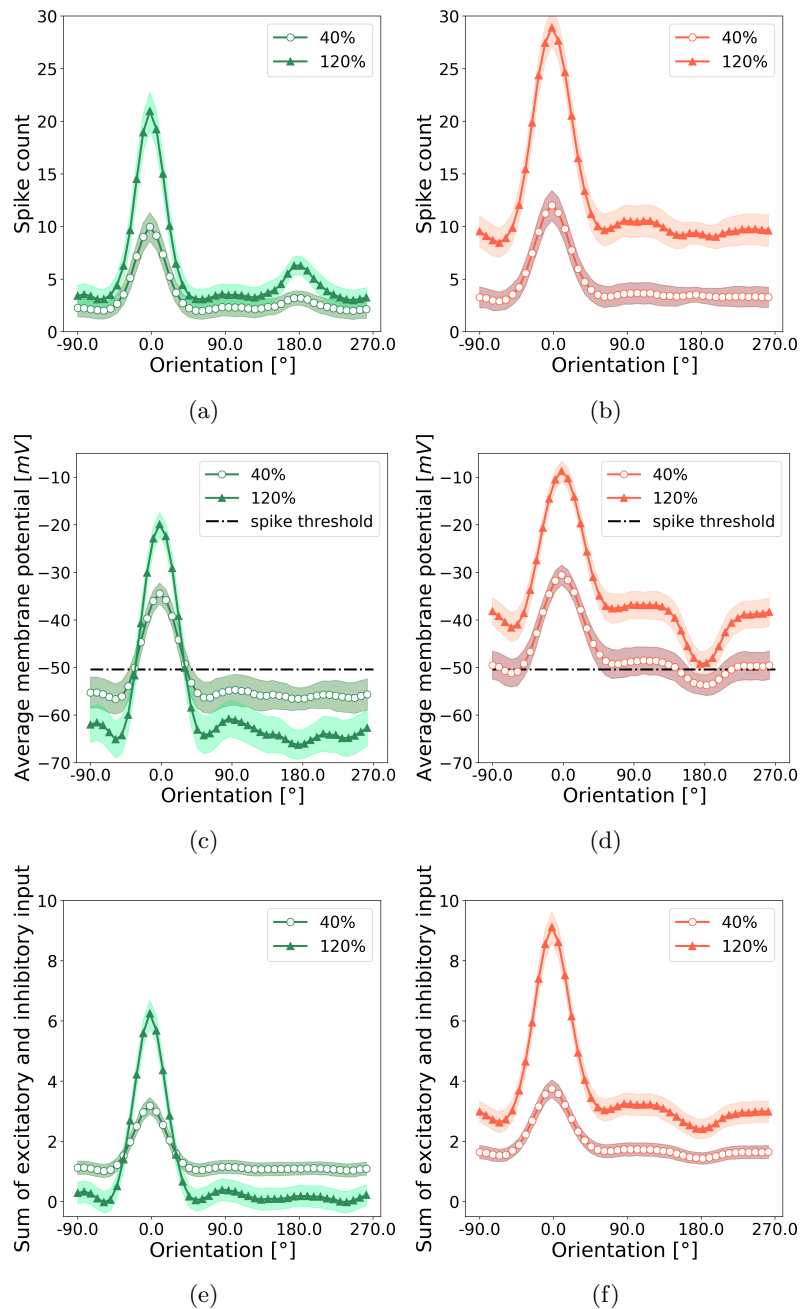

Figure 7: **Emergence of contrast-invariant responses** (a) Average neural tuning curve for low and high contrast stimuli in the *EI2/1* model, (b) and the *EI3/1* model. (c) Average membrane potential (averaged across all neurons in the excitatory population) as a function of orientation and contrast level for the *EI2/1* model, (d) and the *EI3/1* model. (e) Sum of the excitatory and inhibitory input current as a function of orientation and contrast level for the *EI2/1* model, (f) and the *EI3/1* model.

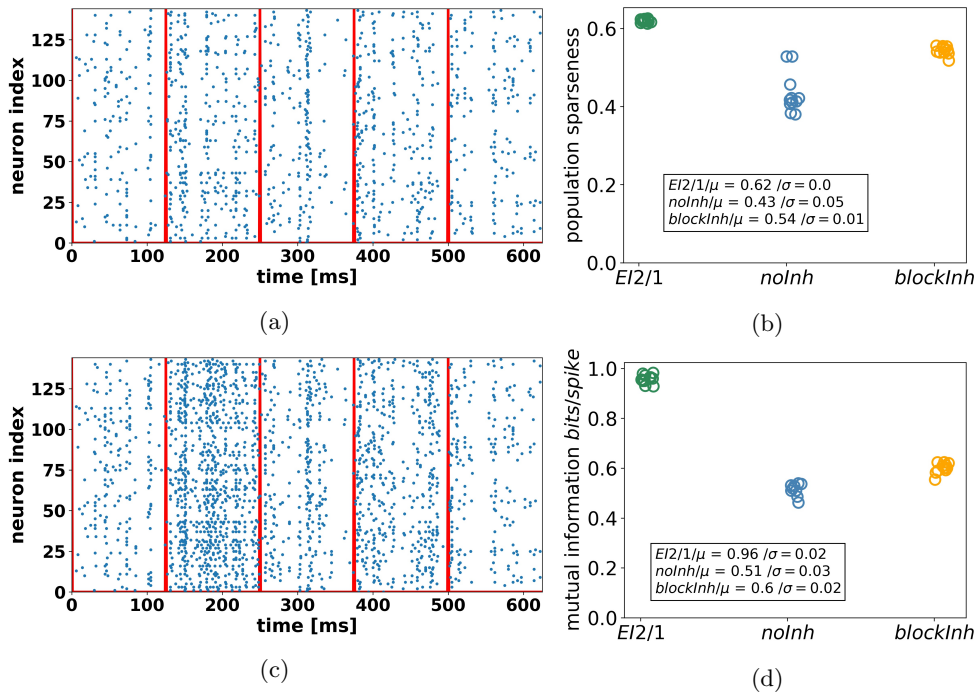

Figure 8: **Sparse and efficient input representation through the inhibitory circuit.** (a) Raster plot of the excitatory population for the *EI2/1* model and for the *blockInh* model ((c)). Spikes are recorded on the same five natural image patches. The red lines show the stimulus onset. (b) Population sparseness for the *EI2/1*, the *blockInh*, and the *noInh* model, averaged over 10,000 natural scene patches. A higher value represents a higher sparseness of population activity. (d) Mutual information in *bits/spike* for the same three models as in (b). (b),(d) shows data from eleven independent simulations per model configuration.

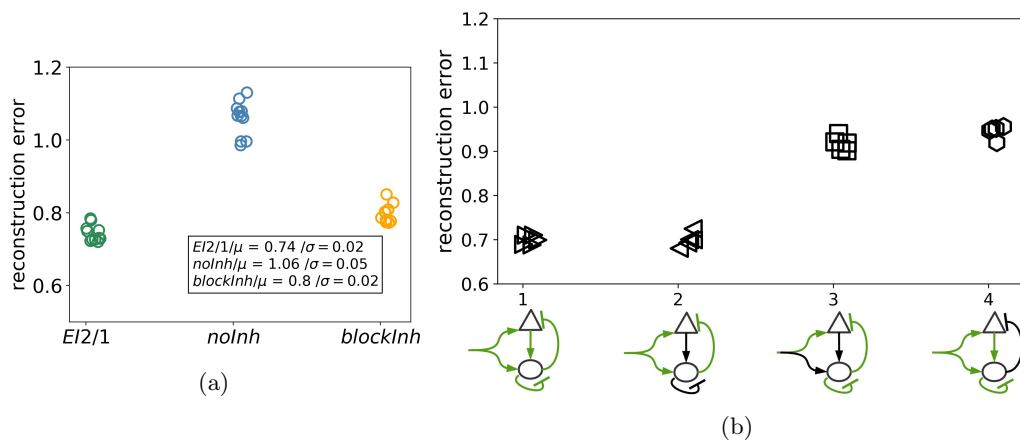

Figure 9: **Plastic inhibition during learning improves input encoding quality.** (a) Image reconstruction error (IRE) for the *EI2/1* model (green dots), the *blockInh* model (orange dots), and the *noInh* model (blue dots). IRE is calculated as the mean-square error between input image and the reconstruction. Better reconstruction is represented by a smaller value. Data shown from eleven independent simulations per model configuration. (b) Image reconstruction error for model variations with different combinations of plastic and fixed excitatory and inhibitory synapses. Only in the first two variations (black triangles), the feed-forward inhibition and the inhibitory feedback are plastic. Plastic synapses indicated by green connections and fixed synapses by black connections.

### 253 **3 Discussion**

254 Our model suggests that a single underlying mechanism - the interaction of excitatory and inhibitory  
255 plasticity - can explain the stable emergence of reliable and efficient input encoding. We have shown that  
256 in particular, the combination of plastic inhibitory feedback and plastic feed-forward inhibition has an  
257 influence on shaping the receptive fields. This is in line with recent physiological findings that inhibitory  
258 plasticity influences the mode of operation of excitatory neurons (for example the excitability) (Griffen  
259 & Maffei, 2014; Wang & Maffei, 2014; Khan et al., 2018; Znamenskiy et al., 2018), or influences the  
260 occurrence of LTP and LTD (Paille et al., 2013; Griffen & Maffei, 2014; Mongillo & Loewenstein, 2018).  
261 Previous models based on STDP rules, which have demonstrated the emergence of V1 simple cells, made  
262 several simplifications in terms of the learning dynamics (Savin et al., 2010; Zylberberg et al., 2011;  
263 King et al., 2013), or consider plasticity only for a subset of projections (Sadeh et al., 2015; Miconi et  
264 al., 2016). These assumptions make it difficult to investigate the influence of plastic feed-forward and  
265 feedback inhibition on network dynamics and input encoding. For example, the observation of response  
266 decorrelation is a direct consequence of the chosen learning mechanism (Zylberberg et al., 2011; King et  
267 al., 2013). Other learning rules have been designed to optimize the mutual information between input  
268 and output (Savin et al., 2010). This suggests that a more detailed model of V1 circuit development  
269 is necessary to understand the dynamics between excitation and inhibition during the developmental  
270 process. To advance our understanding of this process, we investigated a spiking network model of V1 sim-  
271 ple cell development, based on two phenomenological learning rules implemented at all synaptic projections.

272  
273 **Feed-forward and feedback inhibitory plasticity improves representational efficiency** Our results show  
274 that plastic inhibitory feedback as well as plastic feed-forward inhibition influence the development of V1  
275 simple cells and improve representational efficiency. Inhibitory plasticity has been reported in numerous  
276 physiological studies (Froemke et al., 2007; Carvalho & Buonomano, 2009; Kullmann et al., 2012; Wang  
277 & Maffei, 2014; D'Amour & Froemke, 2015; Khan et al., 2018). Previous model studies suggest a role  
278 for inhibitory plasticity in controlling the balance between excitation and inhibition (Vogels et al., 2011;  
279 Litwin-Kumar & Doiron, 2014), or in enabling stability in recurrent networks (Litwin-Kumar & Doiron,  
280 2014; Sprekeler, 2017). However, there is ongoing discussion about the necessity and role of inhibitory  
281 plasticity during learning a functional sensory code book (Griffen & Maffei, 2014; Srinivasa & Jiang, 2013;  
282 Sprekeler, 2017), and this issue has received limited attention in model studies so far.  
283 In a model based on a combination of STDP and inhibitory STDP learning rules, Litwin-Kumar &  
284 Doiron (2014) showed that inhibitory plasticity is necessary for stable learning in a network with recurrent  
285 excitatory connections. Their study used a generic cortical network receiving non-plastic input from a set

286 of 20 artificially stimuli, which in turn resulted in the formation of 20 assemblies representing the input  
287 stimuli. They emphasized that inhibitory plasticity acted to equilibrate firing rates in the network, such  
288 that different assemblies (each coding for one stimulus) received different amounts of inhibition, preventing  
289 dominant activity of single assemblies. Our results of a feature-specific strength of inhibition generalize  
290 their finding of firing rate heterogeneity induced by iSTDP from an “assembly code”, in which different  
291 stimuli rarely overlap, to the quasi-continuous space of natural visual stimuli. This supports the necessity  
292 of the interaction of inhibitory and excitatory plasticity during the development of the visual cortex.

293 **Emergence of a self-organized balance of excitation and inhibition** We observed in our model that  
294 the inhibitory input current to a neuron is proportional to the excitatory input, when the currents are  
295 averaged across the duration of a stimulus. However, as we did not observe an equal strength between  
296 these currents, excitation is dominant in our network. This indicates a detailed and loose balance (for  
297 definition see, Hennequin et al. (2017)) between excitation and inhibition in our network. While a detailed  
298 balance has been reported in rat auditory cortex (Dornn et al., 2010), it is still under discussion if a more  
299 loose or tight balance exists in the primary visual cortex of higher mammals (Froemke, 2015). Recent  
300 model studies suggest a tight balance between inhibition and excitation (Denève & Machens, 2016) or  
301 rather an inhibitory dominated network for stable learning in a network with recurrent excitatory synapses  
302 (Litwin-Kumar & Doiron, 2014; Sadeh et al., 2015; Miconi et al., 2016). However, most of these models  
303 investigate excitation-inhibition balance in a single-neuron setup (Denève & Machens, 2016), or set a  
304 subset of synaptic connections fixed (Litwin-Kumar & Doiron, 2014; Sadeh et al., 2015; Miconi et al.,  
305 2016). Interestingly, we observed that the ratio between excitation and inhibition changes in our network  
306 for different contrast levels of sinusoidal grating stimuli, up to a 1 : 1 balance for the highest contrast level  
307 for the *ET2/1* model. This shows that the balance between excitation and inhibition is input-specific.

308  
309 **Inhibition implements a gain control mechanism and shapes tuning curves** Previous physiological  
310 studies found that parvalbumin-expressing (PV) interneurons have a divisive impact on the gain function  
311 of pyramidal neurons in the visual cortex, to implement a contrast gain control mechanism (Atallah et al.,  
312 2012; Wilson et al., 2012; Y. Zhu et al., 2015). In our model we observed that the ratio between excitatory  
313 and inhibitory currents influences the response of the neuron towards its input. Consequently, feedback  
314 inhibition implements a gain control mechanism for the excitatory neurons.

315 Savin et al. (2010) proposed a rapid intrinsic plasticity mechanism to adapt the neuronal gain function  
316 to optimize the information transmission between input stimuli and neuronal output. They suggested  
317 that the emergence of V1 simple cell receptive fields depends on the interplay between the adaptation of  
318 the neuronal gain function and the synaptic plasticity (Savin et al., 2010). By contrast, in our network,

319 changes in neuronal gain curves are caused by feedback inhibition, which adapts at the fast time scale of  
320 synaptic plasticity to maintain a given target rate.

321 In our model, when blocking inhibition after learning, we observed an increase not only in the baseline  
322 activity, but also in the orientation bandwidth (OBW). This demonstrates a sharpening of tuning curves  
323 by inhibition, similar to the observation of Katzner et al. (2011), where inhibitory synapses in cat primary  
324 visual cortex were blocked with gabazine. Interestingly, PV cells seem not to affect the sharpening  
325 of tuning curves (Atallah et al., 2012; Wilson et al., 2012), whereas somatostatin-expressing neurons  
326 (SOM) sharpen neuronal responses (Wilson et al., 2012). This demonstrates the influences of the different  
327 inhibitory neuron types (Markram et al., 2004), which must be taken into account in future models.

### 328 **Shift in the E/I balance leads to the spontaneous emergence of contrast invariant tuning curves** As

329 a consequence of the contrast gain mechanism by inhibition, our model shows the spontaneous emergence  
330 of contrast invariant orientation tuning (Skottun et al., 1987; Troyer et al., 1998; Finn et al., 2007). Early  
331 modeling studies have proposed feed-forward inhibition to implement a push-pull inhibitory mechanism  
332 for the emergence of contrast-invariant tuning curves (Troyer et al., 1998; Ferster & Miller, 2000). Despite  
333 the fact that our network contains feed-forward inhibition, we did not observe a push-pull inhibitory effect,  
334 in other words, anti-correlation of excitation and inhibition (Anderson et al., 2000). A direct comparison  
335 of the excitatory and inhibitory input current for the contrast invariance task shows a simultaneous  
336 increase and decrease of excitation and inhibition, caused by the detailed balance in our network. We  
337 have observed that for the *EI2/1* model, inhibitory input currents increase more rapidly than excitatory  
338 currents at higher contrast levels and non-preferred orientations. This results in a shift from a two-to-one  
339 ratio of excitation to inhibition to a one-to-one ratio between excitation and inhibition, and implements a  
340 contrast-dependent modulation of the neuron's gain curve. This shows that the emergence of contrast-  
341 invariant tuning curves is an inherent effect of the ratio between excitation and inhibition in our network.  
342 A contrast-dependent shift in the balance between excitation and inhibition has been reported in the  
343 visual cortex of awake mice (Adesnik, 2017). Although the influence of inhibition on the neuronal gain  
344 function for the emergence of contrast invariance is in line with previous assumptions (Mitchell & Silver,  
345 2003; Finn et al., 2007), recent studies have proposed that changes in the neuronal gain are caused by  
346 response variability in the afferent thalamic path (Sadagopan & Ferster, 2012; Priebe, 2016).

### 347 **Sparseness and metabolic efficiency benefit from E/I balance** We observed that in the *EI2/1* model,

348 the standard deviation of the membrane potential increases for non-preferred orientations. Together with  
349 the observed asynchronous spiking behavior, we conclude that the balance of inhibition and excitation  
350 leads to a more irregular spiking behavior. Previous work suggests that a more irregular activity and  
351 irregular membrane potential behavior is related to improved metabolic efficiency in terms of efficient



352 input encoding (Denève & Machens, 2016). Our observations agree with these findings, because the  
353 efficiency of information transmission in our network mainly benefits from the ratio between excitatory  
354 and inhibitory currents in the stable network.

355 An established approach in terms of input encoding efficiency is the concept of sparse coding (Rolls &  
356 Tovee, 1995; Vinje & Gallant, 2000; Tolhurst et al., 2009). However, in recent years, it has been discussed  
357 how the level of sparseness reported in physiological experiments is influenced by animal age and the level  
358 of anesthesia (Berkes et al., 2009), and the benefit of highly sparse codes for information processing has  
359 been questioned (Wiltschut & Hamker, 2009; Barak et al., 2013; Spanne & Jörntell, 2015). Overall, the  
360 intermediate sparseness values observed in our model are in agreement with experimental findings (Berkes  
361 et al., 2009; Froudarakis et al., 2014).

362 **Structured connectivity caused by inhibitory and excitatory plasticity** Previous physiological studies  
363 have shown that inhibitory interneurons are connected in a nonspecific manner to other cells in their  
364 surrounding (Harris & Mrsic-Flogel, 2013). However, recent studies observed that inhibitory PV cells  
365 develop strong connections to excitatory cells with similar orientations (Znamenskiy et al., 2018), and  
366 that neurons with similar preferred orientations have a higher probability for recurrent connections (Ko et  
367 al., 2011; Cossell et al., 2015).

368 We observed a similar connectivity pattern in our network, namely, the appearance of strong connectivity  
369 between co-tuned neurons. King et al. (2013) also obtained a structured connectivity between co-tuned  
370 excitatory and inhibitory cells in a spiking network. While King et al. (2013) achieved this goal by  
371 designing a suitable learning rule for the synaptic projections involving inhibitory neurons, we observed  
372 the appearance of strong connectivity as an emergent property of our model architecture based on detailed  
373 phenomenological rules.

374 **Stable learning despite limitations of simultaneous excitatory and inhibitory plasticity** Previous stud-  
375 ies have mentioned the difficulty to achieve a certain level of inhibition in a network with inhibition  
376 and plastic excitatory synapses (Zenke & Gerstner, 2017; Hennequin et al., 2017). We next discuss the  
377 behavior of the selected learning rules more in detail to show some of the difficulties during the interaction  
378 of excitatory and inhibitory plasticity, and discuss the limitations of our modeling approach.

379 For the excitatory learning rule, Clopath et al. (2010) have shown that a lower input firing rate leads  
380 to bigger receptive fields, as a compensatory effect of the homeostatic mechanism. This mechanism is  
381 controlled by the long-term postsynaptic membrane potential in relation to a reference value. If the  
382 membrane potential is too low, less long-term depression (LTD) in relation to long-term potentiation (LTP)  
383 occurs, and the weights will increase. Otherwise, if the membrane potential is too high, a higher amount  
384 of LTD will occur to decrease the weights. Consequently, for a lower input firing rate, more weights will

385 increase, saturating at their maximum, to achieve a specific postsynaptic activity.  
386 The homeostatic mechanism of the inhibitory rule (Vogels et al., 2011) strengthens the inhibition if the  
387 postsynaptic activity is too high, with respect to a target firing rate ( $\rho$ ), or decreases the weight otherwise.  
388 In our network, the postsynaptic membrane potential is a result of the difference between the incoming  
389 excitatory and inhibitory current, such that a reduction in the membrane potential through inhibition is  
390 comparable to a reduction through less presynaptic spikes. The operation of both homeostatic mechanisms  
391 on the postsynaptic activity leads to a competition between weight changes at excitatory and at inhibitory  
392 synapses and should lead to bigger receptive fields, or, in the worst case, to a saturation of all synapses to  
393 their maximum value.  
394 However, we observed the emergence of stable receptive fields and stable connections between the popu-  
395 lations. Additionally, our results show a reduction in the mean activity, caused by inhibition, without  
396 causing bigger receptive fields. We assume that in contrast to a reduction in the input, what leads to a  
397 proportional reduction on the postsynaptic neuron, the inhibitory current leads to a more irregular, or  
398 fluctuating, behavior of the membrane potential (Vogels et al., 2005). To allow LTP at excitatory synapses,  
399 the membrane potential must be higher than  $\theta_+$  ( $= -45.3mV$ ), which is slightly above the steady-state  
400 spiking threshold ( $V_{T_{rest}} = -50.4mV$ ). But if the membrane potential is hyperpolarized by inhibition,  
401 it falls below the LTP threshold: No LTP occurs, and the weights will not increase to the maximum.  
402 Additionally, we observed that the interplay of the excitatory and inhibitory rules are mainly influenced  
403 by the magnitude of learning rates. In particular, a higher excitatory or higher inhibitory learning rate led  
404 to the saturation of all synapses, as an effect of the competition between both homeostatic mechanisms.  
405 How fast the synaptic weight changes depends not only on the magnitude of learning rates, but also on  
406 the number of spikes, that is, the number of learning events. Therefore, the learning rates for the *noInh*  
407 model is smaller, to compensate the higher activity in the neuron populations. Finally, the competitive  
408 pressure between learning rules is controlled by the postsynaptic target activity in the inhibitory learning  
409 rule. Smaller values of  $\rho$  enhances the inhibitory pressure on the post-synaptic neuron to achieve a lower  
410 firing rate and can also lead to an unlimited growth of synaptic weights. This limited the amount of  
411 inhibition that can emerge in the network.

412

413 **Conclusion** To the best of our knowledge, our simulations are the first demonstration of the parallel  
414 emergence of fundamental properties of the primary visual cortex such as sparse coding, contrast invariant  
415 tuning curves and high accuracy input representation, in a spiking network with spike timing-dependent  
416 plasticity rules. A central finding of our study is that the emergence of representational efficiency (such  
417 as tuning diversity) and metabolic efficiency (such as the numbers of spikes to represent a specific input  
418 stimuli) require plasticity at feed-forward and feedback inhibitory synapses. This emphasizes the role of

419 inhibition in the shaping of neuronal responses (Isaacson & Scanziani, 2011; Stringer et al., 2016; Sprekeler,  
420 2017) and in the development of reliable and efficient input encoding.

## 421 **Acknowledgment**

422 This work has been supported by a grant from the European Social Fund (ESF) and the Free State of  
423 Saxony, and by a CRCNS US-German-Israeli collaboration on computational neuroscience grant “Multi-  
424 level neuro-computational models of basal ganglia dysfunction in Tourette syndrome” funded by the  
425 Federal Ministry of Education and Research, Germany (BMBF 01GQ1707).

## 426 **Author Contributions**

|                                      |                          |
|--------------------------------------|--------------------------|
| Conceptualization                    | F.H.H., M.T., L.G., R.L. |
| Methodology                          | M.T., L.G., R.L.         |
| Software                             | R.L.                     |
| Validation                           | R.L.                     |
| Formal Analysis                      | R.L., L.G.               |
| Investigation                        | R.L., L.G., M.T.         |
| Resources                            | F.H.H.                   |
| Writing – Original Draft Preparation | R.L., L.G.               |
| Writing – Review & Editing           | F.H.H., L.G., M.T., R.L. |
| Visualization                        | R.L.                     |
| Funding Acquisition                  | F.H.H.                   |

## 427 **Declaration of Interest**

428 The authors declare no competing interests.

## 429 **4 Methods**

430 The first part of this section (4.1–4.5) describes the network architecture including the neuron model and  
431 learning rules. In the second part (4.6), we explain the analysis methods used to characterize neuronal  
432 responses. The model has been implemented in Python 3.6, using the ANNarchy simulator (Vitay et al.,  
433 2015), with a simulation time step of  $dt = 1ms$  (Euler integration). The neuronal simulator is available  
434 from <https://bitbucket.org/annarchy/annarchy> . The implementation of the adaptive exponential  
435 integrate-and-fire neuron model and the voltage-based triplet STDP learning rule from Clopath et al.  
436 (2010) based mainly on the re-implementation by Larisch (2019).

### 437 **4.1 Network architecture**

438 Our network model, which is inspired by the primary visual cortex and its inputs from LGN, consists  
439 of three populations of spiking neurons (**Fig.1a**): An input layer representing LGN, and excitatory  
440 and inhibitory populations of V1, each receiving feed-forward inputs from LGN. The V1 populations  
441 are mutually interconnected via excitatory or inhibitory synapses, respectively. The circuit therefore  
442 implements both feed-forward and feedback inhibition, in agreement with anatomical findings (Isaacson  
443 & Scanziani, 2011). Inhibitory interneurons receive additional recurrent inhibitory connections. All  
444 projections follow an all-to-all connectivity pattern, excluding self inhibitory feedback connections.

445 The LGN layer consists of 288 neurons showing Poisson activity and is split into ON- and OFF-  
446 subpopulations. For the V1 excitatory population (144 neurons) and the inhibitory population (36  
447 neurons), we used adaptive exponential integrate-and-fire neurons (Sec. 4.3). The size of the inhibitory  
448 population was chosen to match the 4:1 ratio between excitatory and inhibitory neurons found in visual  
449 and striate cortex (Beaulieu et al., 1992; Markram et al., 2004; Potjans & Diesmann, 2014).

450 All synaptic connections within our model are plastic and were randomly initialized. They change  
451 their weight based on either the voltage-based STDP-rule proposed by Clopath et al. (2010) (excitatory  
452 connections) or the symmetric iSTDP-rule proposed by Vogels et al. (2011) (inhibitory connections; Sec.  
453 4.5).

### 454 **4.2 Network input**

455 As network input, we used whitened patches from natural scenes (Olshausen & Field, 1996, 1997). Each  
456 patch was chosen randomly, with a size of 12 by 12 by 2 pixels (Wiltschut & Hamker, 2009). The third  
457 dimension corresponds to the responses of ON- and OFF-cells. To avoid negative firing rates, we mapped  
458 positive pixel values to the ON-plane, and the absolute value of negative pixels to the OFF-plane. Every  
459 patch was normalized with the maximum absolute value of the corresponding natural scene. The firing  
460 rate of each Poisson neuron represents the brightness value of the input pixels. The firing rate associated

461 to the (rarely occurring) maximum pixel value was set to  $125Hz$ . We stimulated the network with 400.000  
462 patches during training, with a presentation time of  $125ms$  per patch, corresponding to around  $14h$  of  
463 simulated time. To avoid any orientation bias in the input, the patch was flipped around the vertical or  
464 horizontal axis independently with 50% probability (Clopath et al., 2010).

### 465 4.3 Poisson neuron model in LGN

466 For modeling convenience, we generated Poisson activity in LGN neurons by injecting brief voltage pulses,  
467 generated by a Poisson process, into a binary spiking neuron model, such that each voltage pulse input  
468 triggered a spike. This simplified the numerical calculation of a spike trace required for the learning rule,  
469 while preserving the precise timing of spikes drawn from a Poisson process. The spike trace  $\bar{x}_i$  is updated  
470 whenever the presynaptic neuron  $i$  spikes, and decays exponentially:  $X_i(t) = 1$  if a spike is present at  
471 time  $t$ , and  $X_i(t) = 0$  otherwise.

$$\frac{du}{dt} = I_{Poisson} \quad (1)$$

$$\tau_x \frac{d\bar{x}_i}{dt} = -\bar{x}_i + X_i \quad (2)$$

### 473 4.4 Adaptive exponential integrate-and-fire neurons in V1

474 For the neurons in the V1 excitatory and inhibitory layer, we used a variant of the adaptive exponential  
475 integrate-and-fire model as described by Clopath et al. (2010). In this model, the membrane potential  
476  $u$  is influenced by the following additional dynamical variables: An adaptive spike threshold,  $V_T$ , a  
477 hyperpolarizing adaptation current,  $w_{ad}$ , and a depolarizing afterpotential,  $z$ . Excitatory and inhibitory  
478 synaptic currents are denoted by  $I_{exc}$  and  $I_{inh}$ . For an explanation of constant parameter values as used  
479 by Clopath et al. (2010), see Table 1. The full equation for the membrane potential is

$$C \frac{du}{dt} = -g_L(u - E_L) + g_L \Delta_T e^{\frac{u - V_T}{\Delta_T}} - w_{ad} + z + I_{exc} - I_{inh} \quad (3)$$

480 As the triplet voltage STDP rule is sensitive to the precise time course of the membrane voltage, including  
481 the upswing during a spike, the magnitude of weight changes depends on the implementation details of  
482 the after-spike reset. To avoid long simulation times associated with smaller time steps, we opted for the  
483 following simplified treatment of the spike waveform which reproduced the results reported by Clopath et  
484 al. (2010): Whenever the membrane potential  $u$  exceeded the spike threshold,  $u$  was held at a constant  
485 value of  $29mV$  for  $2ms$ , and then reset to the resting potential  $E_L$ . We obtained highly similar results  
486 from an alternative implementation, in which the after-spike reset was immediately applied when the  
487 spike threshold was crossed, with an additional update of the voltage traces by the amount expected from

488 a 2ms-long spike (data not shown).

489 The reset value for the spike threshold is  $V_{T_{max}}$ , with exponential decay towards the resting value  $V_{T_{rest}}$ ,  
490 with a time constant  $\tau_{V_T}$  (Eq. 4):

$$\tau_{V_T} \frac{dV_T}{dt} = -(V_T - V_{T_{rest}}) \quad (4)$$

491 The afterpotential  $z$  has a reset value of  $I_{sp}$  and decays to zero (Eq.5). Further, the variable  $w_{ad}$  is  
492 incremented by the value  $b$  and decays exponentially (Eq. 6).

$$\tau_z \frac{dz}{dt} = -z \quad (5)$$

493

$$\tau_{w_{ad}} \frac{dw_{ad}}{dt} = a(u - E_L) - w_{ad} \quad (6)$$

494 The model proposed by Clopath et al. (2010) assumed excitatory synaptic input in the form of voltage  
495 pulses. For modeling convenience, we approximated this setting by current-based excitatory synapses  
496 with a short time constant of 1ms. Inhibitory synaptic currents decayed with a slower time constant  
497 of 10ms. Both synaptic currents are incremented by the sum of synaptic weights of those presynaptic  
498 neurons which spiked in the previous time step:

$$\begin{aligned} \tau_{I_{exc}} \frac{dI_{exc}}{dt} &= -I_{exc} + w_i^{exc} \sum_{i \in Exc} \delta(t - t'_i) \\ \tau_{I_{inh}} \frac{dI_{inh}}{dt} &= -I_{inh} + w_j^{inh} \sum_{j \in Inh} \delta(t - t'_j) \end{aligned} \quad (7)$$

499 where  $t'_i$  denotes the spike time of presynaptic neuron  $i$ , and  $\delta$  is the indicator function with  $\delta(0) = 1$ .

## 500 4.5 Synaptic plasticity

### 501 4.5.1 Voltage-based triplet STDP at excitatory synapses

502 Plasticity at excitatory connections (LGN to Exc. and Exc. to Inh.) follows the voltage-based triplet  
503 STDP rule proposed by Clopath et al. (2010). We here repeat the essential features of this plasticity  
504 model. The neuronal and synaptic variables describing the development of the weight from a presynaptic  
505 neuron with index  $i$  onto a given postsynaptic neuron are:  $X_i$ , the presence of a presynaptic spike;  $\bar{x}_i$ ,  
506 the presynaptic spike trace (Eq. 2);  $u$ , the postsynaptic neuron's membrane potential; and two running  
507 averages of the membrane potential,  $\bar{u}_+$  and  $\bar{u}_-$ , defined as follows:

$$\tau_+ \frac{d\bar{u}_+}{dt} = -\bar{u}_+ + u, \quad (8)$$

508 where  $\bar{u}_-$  is defined analogously, with the time constant  $\tau_-$ . In addition, the learning rule includes a  
509 homoeostatic term,  $\bar{u}$ , which regulates the relative strength of LTD versus LTP, and which measures the

510 mean postsynaptic depolarization on a slower time scale:

$$\tau_{\bar{u}} \frac{d\bar{u}}{dt} = [(u - E_L)^+]^2 - \bar{u} \quad (9)$$

511 Here,  $x^+ = \max(x, 0)$  denotes top-half rectification.

512 The full learning rule is given as the sum of the LTP term and the LTD term:

$$\frac{dw_i}{dt} = A_{LTP} \bar{x}_i (u - \theta_+)^+ (\bar{u}_+ - \theta_-)^+ - A_{LTD} \frac{\bar{u}}{u_{ref}} X_i (\bar{u}_- - \theta_-)^+ \quad (10)$$

513 where  $A_{LTP}$  and  $A_{LTD}$  are the learning rates for LTP and LTD,  $\theta_+$  and  $\theta_-$  are threshold parameters,  
 514 and  $u_{ref}$  is a homeostatic parameter which controls the postsynaptic target firing rate. Clopath et al.  
 515 (2010) have shown that this learning rule results in BCM-like learning dynamics (Bienenstock et al., 1982),  
 516 in which a sliding metaplasticity threshold leads to the development of selectivity.

517 Following Clopath et al. (2010), for the LGN efferent connections, we equalized the norm of the OFF  
 518 weights to the norm of the ON weights every 20s. The weight development is limited by the hard bounds  
 519  $w_{min}^e$  and  $w_{max}^e$ .

#### 520 4.5.2 Homeostatic inhibitory plasticity

521 Previous biological studies have observed spike timing-dependent plasticity of inhibitory synapses which  
 522 differs from the well-known asymmetric STDP window (Caporale & Dan, 2008; D'Amour & Froemke,  
 523 2015). We therefore chose to implement the phenomenologically motivated, symmetric inhibitory STDP  
 524 (iSTDP) rule proposed by Vogels et al. (2011) at all inhibitory synapses (Eq.11):

$$w(t + dt) = \begin{cases} w(t) + \eta(\bar{x}_{post} - \rho) & \text{if } t = t_{pre} \text{ (presynaptic spike)} \\ w(t) + \eta\bar{x}_{pre} & \text{if } t = t_{post} \text{ (postsynaptic spike)} \end{cases} \quad (11)$$

525 Here,  $\eta$  is the learning rate, and  $\rho$  is a constant which controls the amount of LTD relative to LTP. Further,  
 526 Vogels et al. (2011) have shown that this learning rule has a homeostatic effect, and the parameter  $\rho$   
 527 controls the postsynaptic target firing rate. The variables  $\bar{x}_{pre}$  and  $\bar{x}_{post}$  are spike traces for the pre- and  
 528 postsynaptic neurons, defined in analogy to Eq. (2), with time constants  $\tau_{pre}$  and  $\tau_{post}$ . In this plasticity  
 529 rule, near-coincident pre- and post-synaptic spiking causes potentiation of weights, irrespective of their  
 530 temporal order. By contrast, isolated pre- or postsynaptic spikes cause depression of weights. As for the  
 531 excitatory learning rule, weights are bounded by  $w_{min}^i$  and  $w_{max}^i$ . For parameter values, see Table 1.



| Global parameter values                            |                       |                                                 |                      |
|----------------------------------------------------|-----------------------|-------------------------------------------------|----------------------|
| Parameter                                          | Value                 | Parameter                                       | Value                |
| (values from Clopath et al. (2010))                |                       |                                                 |                      |
| $C$ , membrane capacitance                         | $281pF$               | $\tau_z$ , spike current time constant          | $40ms$               |
| $g_L$ , leak conductance                           | $30nS$                | $\tau_{V_T}$ , spike threshold time const.      | $50ms$               |
| $E_L$ , resting potential                          | $-70.6mV$             | $\tau_x$ , spike trace time constant            | $15ms$               |
| $\Delta_T$ , slope factor                          | $2mV$                 | $\tau_{wad}$ , adaption time constant           | $144ms$              |
| $V_{T_{rest}}$ , spike threshold at rest           | $-50.4mV$             | $I_{sp}$ , spike current after spike            | $400pA$              |
| $V_{T_{max}}$ , spike threshold after spike        | $30.4mV$              | $a$ , subthreshold adaptation                   | $4nS$                |
| $w_{min}^e$ , min. excitatory weight               | 0.0                   | $b$ , spike-triggered adaption                  | $0.805pA$            |
| $\tau_-$ , time constant for $\bar{u}_-$           | $10.0ms$              | $\tau_+$ , time constant for $\bar{u}_+$        | $7.0ms$              |
| $\theta_-$ , plasticity threshold                  | $-70.6mV$             | $\theta_+$ , plasticity threshold (LTP)         | $-45.3mV$            |
| Parameter (added)                                  | Value                 | Parameter                                       | Value                |
| $\tau_{I_{exc}}$ , excitatory input time const.    | $1.0ms$               | $\tau_{I_{inh}}$ , inhibitory input time const. | $10.0ms$             |
| Projection-specific parameters                     |                       |                                                 |                      |
| Parameter (custom values)                          | $LGNtoE$              | $LGNtoI$                                        | $EtoI$               |
| $\tau_{\bar{u}}$                                   | $750ms$               | $750ms$                                         | $750ms$              |
| $w_{max}^e$                                        | 5.0                   | 3.0                                             | 1.0                  |
| $w_{init}$ (bounds of random uniform distribution) | [0.015, 2.0]          | [0.0175, 2.15]                                  | [0.0175, 0.25]       |
| $A_{LTP}$ ( $EI2 : 1, EI3 : 1$ )                   | $1.35 \times 10^{-4}$ | $5.4 \times 10^{-5}$                            | $1.2 \times 10^{-5}$ |
| $A_{LTD}$ ( $EI2 : 1, EI3 : 1$ )                   | $1.05 \times 10^{-4}$ | $4.2 \times 10^{-5}$                            | $1.4 \times 10^{-5}$ |
| $A_{LTP}$ ( $noInh$ )                              | $7.2 \times 10^{-5}$  | n/a                                             | n/a                  |
| $A_{LTD}$ ( $noInh$ )                              | $5.6 \times 10^{-5}$  | n/a                                             | n/a                  |
| $\bar{u}_{ref}$                                    | $60.0mV^2$            | $55.0mV^2$                                      | $55.0mV^2$           |

Table 1: **Parameters for the neuron model and excitatory synapses.** Note that for the *noInh* model, learning rates were reduced to compensate for the increased firing rates in the absence of inhibition.

|                      | ItoE and ItoI | ItoE      | ItoI      |
|----------------------|---------------|-----------|-----------|
| $\tau_{post}$        | $10.0ms$      |           |           |
| $\tau_{pre}$         | $10.0ms$      |           |           |
| $w^i$ initial        | 0.0           |           |           |
| $w_{min}^i$          | 0.0           |           |           |
| $w_{max}^i$          |               | 0.7       | 0.5       |
| $\eta$               |               | $10^{-5}$ | $10^{-5}$ |
| $\rho$ ( $EI3 : 1$ ) |               | 0.7       | 0.6       |
| $\rho$ ( $EI2 : 1$ ) |               | 0.4       | 0.6       |

Table 2: **Parameters for inhibitory synapses.**

### 532 4.5.3 Choice of parameter configurations

533 As our main goal is to determine the influence of inhibitory strength both on the formation of selectivity  
534 and on the dynamics of stimulus coding, we simulated our network using different parameter and network  
535 configurations. First, we used the above presented network, where the strength of the inhibitory feedback  
536 is controlled by the homeostatic parameter  $\rho$ . With  $\rho = 0.4$  for the feedback inhibitory synapses, we  
537 achieved a ratio of excitation to inhibition (E/I-ratio) of approximately 2 : 1 on patches of natural scenes  
538 (abbreviated as *EI2/1*). On one hand, a lower  $\rho$  would strengthen the inhibitory feedback, but caused  
539 unstable behaviour during learning. On the other hand, a higher  $\rho$  would weaken the inhibitory feedback of  
540 the model. With  $\rho = 0.7$  we achieve a E/I-ratio of approximately 3 : 1 on natural scene input (abbreviated  
541 as *EI3/1*), this led to similar but weaker characteristics for most of the experiments (**Fig.1b**). Because  
542 of this, the data are only presented for experiments, where the weaker inhibitory feedback lead to a  
543 significance difference.

544 Second, we simulated a purely excitatory feed-forward network without any inhibitory activity (abbreviated as *noInh*), as the learning rule proposed by Clopath et al. (2010) is capable of learning distinct  
545 shapes of receptive fields given different initial weights.  
546

547 Further, to control for the dynamical effects of inhibition in the steady state following receptive field  
548 development, we simulated the effects of deactivating the inhibitory synaptic transmission in the *EI2/1*  
549 model after learning (abbreviated as *blockInh*). All three model variations are based on the same network  
550 architecture, except that inhibitory weights differ in their strength or are deactivated. The different  
551 parameters for learning the models are shown in Table 1. To test the stability and the reproducibility of  
552 our results, we performed eleven runs of each model with randomly initialized synaptic weights.

553 To evaluate how inhibitory plasticity interacts with plastic excitation, we deactivated the plasticity for  
554 specific synapses for three model variations. First, we deactivated the plasticity only in the inhibitory  
555 feedback connections. Second, the plasticity was deactivated in both excitatory connections the inhibitory  
556 population. And we deactivated the plasticity in the connections from the excitatory to the inhibitory  
557 population and for the lateral inhibition. Additionally, we trained one model variation where all connections  
558 are plastic to validate, that the learning is successful with pre-trained, shuffled weight matrices. To ensure,  
559 that the same average amount of excitatory or inhibitory current is conveyed by the fixed synapses, we  
560 used shuffled weight matrices from previous simulations of the *EI2/1* model for the respective synapses.  
561 No parameter changes were needed. To test the stability and reproducibility, we performed five runs of  
562 each variation.

## 563 **4.6 Analysis methods**

### 564 **4.6.1 Receptive field mapping**

565 Over the course of learning, the excitatory input weights from LGN to V1 develop based on the pre- and  
566 postsynaptic activity. It is therefore possible to obtain a good approximation of the neurons' receptive  
567 fields (RFs) by taking the weight matrix and reverting the ON-OFF mapping. To do this, we subtract the  
568 OFF-synapses from the ON-synapses and receive the receptive field. This is possible as either the ON- or  
569 the OFF-synapses can be activated by the input, so that the weights will also follow this distribution.  
570 In addition to the visualization based on weight matrices, the receptive fields can also be revealed by  
571 probing the neurons with random stimuli. This approach has been successfully used in physiological  
572 research, in form of the spike triggered average (STA) (Ringach & Shapley, 2004; Schwartz et al., 2006;  
573 Pillow & Simoncelli, 2006). In this method, a neuron's receptive field is defined as the average of white  
574 noise stimuli, weighted by the stimulus-triggered neuronal activity. We applied this method on the learned  
575 neural network. We presented noise patches drawn from a normal distribution with  $\mu = 15$ ,  $\sigma = 20$  as  
576 input image to the network, and converted these to Poisson spike trains (cf. Sec. 4.2). Negative pixel  
577 values were set to zero, and the presentation time per patch was  $125ms$ . For each neuron, we recorded  
578 the number of spikes per stimulus and calculated the average across all stimuli, weighted by the number  
579 of postsynaptic spikes (Eq. 12).

$$STA = \frac{1}{N} \sum_{n=1}^N s(t_n) \quad (12)$$

580 Here,  $s(t_n)$  is the input stimulus at time point  $t_n$ , when the  $n$ th spike has occurred, and  $N$  is the total  
581 number of postsynaptic spikes. Accordingly, stimuli evoking more spikes are higher weighted than stimuli  
582 evoking few or no spikes.

583 As we observed a high similarity between each neuron's STA and its ON-OFF receptive field, we concluded  
584 that the overall receptive field shape was not significantly influenced by inhibition. Thus, for simplicity,  
585 the feed-forward weight vectors can be used for further evaluations.

### 586 **4.6.2 Gabor fits of receptive fields**

587 As a first approximation, the receptive fields (RFs) of neurons in the primary visual cortex can be well  
588 described by Gabor functions (Jones & Palmer, 1987b). This is commonly used to describe their properties  
589 (Ringach, 2002; Zylberberg et al., 2011). We calculated the RFs of V1 neurons based on their LGN input  
590 weights, as described in Sec. 4.6.1. For each excitatory and inhibitory neuron, we then fit the parameters  
591 of a 2D-Gabor function ( $g(x, y)$ ) to this feed-forward weight matrix, using least-squares minimization.  
592 The Gabor function is defined as followed (Eq. 13) and is similar to the one used in Ringach (2002),

593 extended by an offset parameter  $o$ .

$$\begin{aligned}g(x, y) &= o + A \exp\left(-\frac{x_p^2}{2\sigma_x^2} - \frac{y_p^2}{2\sigma_y^2}\right) \cos(2\pi x_p f - \phi) \\x_p &= (x - x_0) \cos(\theta) + (y - y_0) \sin(\theta) \\y_p &= -(x - x_0) \sin(\theta) + (y - y_0) \cos(\theta),\end{aligned}\tag{13}$$

594 where  $A$  denotes the amplitude,  $\theta$  is the angle of the spatial orientation,  $\sigma_x$  and  $\sigma_y$  are the spatial extents,  
595  $f$  is the spatial frequency,  $\phi$  the phase, and  $x_0$  and  $y_0$  denote the position of the center.

596 We used the normalized mean squared error (NMSE) (Eq.14) to calculate the fitting error between the  
597 Gabor-function  $g$  and the weight vector  $w$  of a neuron (Spratling, 2012). The function normalizes the  
598 quadratic fitting error by the length of the weight vector and allows to compare error rates between  
599 different models. It allows to define a threshold until a RF is accepted as Gabor-like, we define this  
600 threshold as 0.5. Neurons with higher values have been excluded from evaluations based on the Gabor fit  
601 (see Results for details).

$$NMSE = \frac{\sum_i (g_i - w_i)^2}{\sum_i w_i^2}\tag{14}$$

#### 602 4.6.3 Receptive field similarity

603 As mentioned above, the feed-forward weight vector approximates the receptive field of a neuron. To  
604 measure the similarity between two receptive fields, we calculate the cosine between their feed-forward  
605 weight vectors (Eq. 15).

$$\cos(\phi_{i,j}) = \frac{W_i \cdot W_j}{|W_i| |W_j|}\tag{15}$$

606 A value near +1 indicates high similarity, values around zero describe orthogonal weight vectors, and  
607 values near -1 indicates inverted weight vectors (i.e., maximally overlapping RFs with opposite directional  
608 preference).

#### 609 4.6.4 Tuning curves and orientation selectivity

610 The orientation selectivity is a well-studied characteristic of simple cells in V1 of mammals (Gilbert &  
611 Wiesel, 1990; Priebe & Ferster, 2008; Niell & Stryker, 2008) and thus, also a topic of interest for models  
612 of the visual cortex (e.g., Sadeh et al., 2014; W. Zhu et al., 2010; Tao et al., 2004). One possibility to  
613 quantify the orientation selectivity of a neuron is to measure its tuning curve (Ringach et al., 2002).  
614 For simple cells in the primary visual cortex, the orientation tuning curve describes the magnitude of  
615 responses evoked by a stimulus presented at different angles. In many biological studies, the tuning curves  
616 have been measured based on two-dimensional sinusoidal gratings (Anderson et al., 2000; Smith & Kohn,  
617 2008; Ringach et al., 2002; Katzner et al., 2011). Therefore, we measured the responses to sinusoidal

618 grating stimuli, rotated in steps of  $8^\circ$ , with different spatial phases from  $0rad$  to  $\pi rad$ , a different spatial  
619 frequencies from 0.05 up to  $0.15cycles/pixel$ , centred to the input space and with a presentation time of  
620  $125ms$ .

621 Because of Poisson activity in the input layer, neuronal activity shows trial-to-trial fluctuations. Hence,  
622 we repeated every presentation 50 times, and calculated the mean across all 50 repetitions (or  $6.25s$   
623 presentation time). In contrast to the natural scene input used for training, the maximum input firing  
624 rate was set to  $85.7Hz$ . This was suitable to obtain sufficiently high activity levels.

625 To estimate tuning curve sharpness, we calculated the orientation bandwidth (OBW) for every neuron.  
626 The OBW is defined as the half-width of the tuning curve, at an activity level of  $\frac{1}{\sqrt{2}}$  (approx. 70.7%) of  
627 the maximum (Ringach et al., 2002). Higher OBW values correspond to a broader tuning curve, and vice  
628 versa. Other definitions use the height at half-maximum, which does not change the overall result of this  
629 evaluation.

#### 630 **4.6.5 Neuronal gain curves**

631 A neuron's gain function describes how neuronal activity is scaled by variations in the magnitude of  
632 excitatory inputs (Katzner et al., 2011; Isaacson & Scanziani, 2011). While an integrate-and-fire neuron  
633 receiving only excitatory inputs has a relatively static gain function (also called transfer function),  
634 controlled by the parameters of the neuron model, additional inhibitory inputs can modulate the effective  
635 input-to-output relationship. To characterize these inhibitory influences on gain curves, we recorded  
636 the excitatory synaptic currents and spiking activity evoked by sinus gratings (see Sec. 4.6.4), which  
637 we rotated from the orthogonal towards the preferred orientation of each neuron. Further, we changed  
638 the contrast of the input, by changing the pixels relative to the maximum input firing from  $14.25Hz$   
639 up to  $100Hz$ . As before, we presented each stimulus orientation for  $125ms$ , repeated 50 times ( $6.25s$ ),  
640 and determined gain curves based on the average spike count across these 50 repetitions. We measured  
641 the spike count for each input degree and contrast strength and sorted the neuronal activity to the  
642 corresponding excitatory input, in ascending order.

#### 643 **4.6.6 Measurement of E to I ratio**

644 To determine the ratio between excitatory and inhibitory input current, we measure both incoming currents  
645 for the excitatory population for 1.000 randomly chosen natural scenes. Every scene was presented for  
646  $125ms$  and was repeatedly shown for 100 times. We averaged the incoming currents over the input stimuli  
647 repetitions and sorted for each neuron and stimuli the excitatory input currents ascending with the related  
648 inhibitory currents. For better visualization, the currents are summarized into bins.

#### 649 4.6.7 Sparseness

650 The sparseness value expresses the specificity of population codes and single neurons, both in experimental  
651 studies (Rolls & Tovee, 1995; Vinje & Gallant, 2000, 2002; Weliky et al., 2003; Tolhurst et al., 2009) and  
652 in model simulations (Wiltschut & Hamker, 2009; Zylberberg et al., 2011; King et al., 2013). It quantifies  
653 either the fraction of neurons which respond to a single stimulus, called population sparseness, or the  
654 number of stimuli to which a single neuron responds, called lifetime sparseness (Tolhurst et al., 2009). In  
655 the past, many different sparseness measurements are established (Rolls & Tovee, 1995; Hoyer, 2004). To  
656 measure the specificity of our network activity, we calculated the population sparseness after Vinje &  
657 Gallant (2000) (see Eq. 16).

$$S = \frac{1 - \frac{(\sum r_i/n)^2}{\sum (r_i^2/n)}}{1 - (1/n)} \quad (16)$$

658 where  $r_i$  is the activity of the  $i$ th neuron to a specific input and  $n$  the number of neurons in the neuron  
659 population.

660 By construction, sparseness values are bound between zero and one. If the neuron population has dense  
661 activity, i.e., most neurons are active to an input stimulus, the sparseness level approaches zero. By  
662 contrast, few active neurons of the population lead to a sparseness value close to one. As input, we used  
663 30.000 natural scene patches, and determined sparseness values based on the firing rates of each neuron  
664 on each input patch.

#### 665 4.6.8 Image reconstruction error

666 The network's coding performance following training can be measured by the difference between input  
667 images and their reconstruction from network activity. This method gives direct insight on how well  
668 visual input is represented by the network as a whole. This aspect was often not considered in previous  
669 biologically motivated circuit models of the primary visual cortex. We used the root mean-square error  
670 between one image of the natural scenes dataset from Olshausen & Field (1996) and the reconstructed one  
671 (cf. Zylberberg & DeWeese, 2013; King et al., 2013) (Eq. 17), termed image reconstruction error (IRE):

$$IRE = \sqrt{\frac{\sum_k (I_o - I_r)^2}{N}} \quad (17)$$

672 where  $N$  denotes the number of image pixels. To obtain the reconstructed image  $I_r$ , we subdivided the full  
673 image into patches of size  $12 \times 12$ , in an overlapping fashion (in increments of 3 pixels). We showed each  
674 patch 50 times for 125ms each, and recorded neuronal activities. We weighted the activity of each neuron  
675 by its feed-forward weights to obtain a linear reconstruction of each image patch, which we combined  
676 to reconstruct the full image. This approach is equivalent to calculating the IRE for individual patches,  
677 and calculating the root mean-square of these individual IRE values. To ensure that pixel values of the

678 reconstructed image were in the same range as the original image, we normalized the reconstructed as well  
679 as the original image to zero mean and unit variance (Zylberberg & DeWeese, 2013; King et al., 2013).

#### 680 4.6.9 Mutual information

681 An information-theoretic approach to estimate the coding efficiency of the network is based on the mutual  
682 information between stimulus identity and neuronal activity (Dayan & Abbott, 2001; Dadarlat & Stryker,  
683 2017). This measure allows to calculate the average information transmission per spike (Vinje & Gallant,  
684 2002; Sengupta et al., 2013). To quantify information transmission, we calculated the mutual information,  
685  $I(s, r)$ , between the stimulus identity and neuronal responses for each neuron, following Vinje & Gallant  
686 (2002):

$$I(s, r) = H(r) - H(r|s) \quad (18)$$

687 In Eq. 18,  $I(s, r)$  is the mutual information carried between stimulus and response for a time bin of  $125ms$   
688 length, the duration of a single stimulus. For that purpose, we calculate the total response entropy,  $H(r)$ ,  
689 and the conditional response entropy, also called stimulus-specific noise entropy,  $H(r|s)$ .

$$H(r) = - \sum_{j=0}^{\infty} p_j \log_2(p_j) \quad (19)$$

$$H(r|s = k) = - \sum_{j=0}^{\infty} p_j^k \log_2(p_j^k) \quad (20)$$

691 The total response entropy is given by Eq. 19. The variable  $p_j$  is the number of time bins containing  
692 exactly  $j$  spikes, divided by the total number of time bins, or stimuli. It follows from Eq. 19 that the  
693 total response entropy is maximal if all spike counts occur with equal probability (and, if they do, the  
694 number of possible spike counts increases the entropy). The noise entropy for a specific stimulus (see Eq.  
695 20) describes the variability of the neuronal responses across repetitions of a single stimulus  $k$ . Every  
696 stimulus was repeated 100 times. Similar to the total response entropy,  $j$  is the number of spikes which  
697 occurred in response to a stimulus  $k$ . Here,  $p_j^k$  is the number of repetitions of stimulus  $k$  to which exactly  
698  $j$  spikes are emitted, divided by the overall number of repetitions of that stimulus. To calculate the overall  
699 noise entropy of a neuron  $H(r|s)$ , we averaged the noise entropy across all stimuli. Information per spike  
700 was computed by dividing  $I(s, r)$  by the mean number of spikes per stimuli, or time bins.

#### 701 4.6.10 Discriminability

702 To evaluate how well the network responses allow to distinguish between any two input patches, in the  
703 presence of trial-to-trial (how much is the variance in the firing rate of a neuron to specific input (Shadlen  
704 & Newsome, 1998)) fluctuations induced by Poisson input, we calculated the discriminability index,  $d'$

705 (e.g., Dayan & Abbott, 2001; Dadarlat & Stryker, 2017). The  $d'$  index measures the separation of two  
706 random distributions, and is closely related to the performance of a linear classifier assuming independent  
707 neuronal responses. Based on a random set of 500 natural scene patches, we calculated the  $d'$  by pairing  
708 the response on every patch to all other patches. For each pair of stimuli,  $s_1$  and  $s_2$ , we presented each  
709 stimulus with  $N = 100$  repetitions, and recorded the network responses of all  $n = 144$  excitatory neurons  
710 for each repetition, obtaining the  $n$ -dimensional response vectors  $s_1^{(i)}$  and  $s_2^{(i)}$ ,  $i = 1, \dots, N$ . We first  
711 calculated the mean activity of each cell in response to each stimulus, across the  $N$  repetitions (denoted by  
712  $\bar{s}_1$  and  $\bar{s}_2$ ). We next projected each individual population response  $s_1^{(i)}$  and  $s_2^{(i)}$  onto the vector between  
713 these means, by taking the dot product between each response and the difference  $\bar{s}_1 - \bar{s}_2$ :

$$\begin{aligned}\alpha_{s_1}^{(i)} &= s_1^{(i)} \cdot (\bar{s}_1 - \bar{s}_2) \\ \alpha_{s_2}^{(i)} &= s_2^{(i)} \cdot (\bar{s}_1 - \bar{s}_2) \quad \text{for } i = 1, \dots, N\end{aligned}\tag{21}$$

714 where  $\alpha_{s_1}$  and  $\alpha_{s_2}$  denote the projected responses. Next, we calculated the means and variances of  
715 the projected responses  $\alpha_{s_1}$  and  $\alpha_{s_2}$ , denoted by  $(\mu_{s_1}, \sigma_{s_1}^2)$  and  $(\mu_{s_2}, \sigma_{s_2}^2)$ . Finally, we calculate the  
716 discriminability  $d'_{s_1, s_2}$ , as the ratio between the separation of the means and the variances of the projected  
717 data:

$$d'_{s_1, s_2} = \frac{\mu_{s_1} - \mu_{s_2}}{\sqrt{\frac{1}{2}(\sigma_{s_1}^2 + \sigma_{s_2}^2)}}\tag{22}$$

718 Note that we used the same sequence of patches for all model configurations to calculate the discriminability,  
719 and every patch was presented for  $125ms$ . Previous research found that the variance of the response of a  
720 neuron to input stimuli is proportional to the mean (Gershon et al., 1998). Further studies demonstrated  
721 that inhibition leads to less variance in the responses to one repeatedly shown stimulus (Haider et al.,  
722 2010). The discriminability ( $d'$ ) increases if the response variance decreases by the same response mean.  
723 Therefore, we can measure differences in the response variance.



## 724 References

- 725 Adesnik, H. (2017). Synaptic mechanisms of feature coding in the visual cortex of awake mice. *Neu-*  
726 *ron*, 95(5), 1147 - 1159.e4. Retrieved from [http://www.sciencedirect.com/science/article/pii/](http://www.sciencedirect.com/science/article/pii/S0896627317307055)  
727 [S0896627317307055](http://www.sciencedirect.com/science/article/pii/S0896627317307055) doi: <https://doi.org/10.1016/j.neuron.2017.08.014>
- 728 Alitto, H. J., & Usrey, W. M. (2004). Influence of contrast on orientation and temporal frequency  
729 tuning in ferret primary visual cortex. *Journal of Neurophysiology*, 91(6), 2797-2808. Retrieved from  
730 <https://doi.org/10.1152/jn.00943.2003> (PMID: 14762157) doi: 10.1152/jn.00943.2003
- 731 Anderson, J. S., Carandini, M., & Ferster, D. (2000). Orientation tuning of input conductance, excitation,  
732 and inhibition in cat primary visual cortex. *Journal of neurophysiology*, 84, 909-926.
- 733 Atallah, B. V., Bruns, W., Carandini, M., & Scanziani, M. (2012). Parvalbumin-Expressing Interneurons  
734 Linearly Transform Cortical Responses to Visual Stimuli. *Neuron*, 73(1), 159-170. Retrieved from  
735 <http://dx.doi.org/10.1016/j.neuron.2011.12.013> doi: 10.1016/j.neuron.2011.12.013
- 736 Averbeck, B. B., Latham, P. E., & Pouget, A. (2006). Neural correlations, population coding and  
737 computation. *Nature Reviews Neuroscience*, 7(May). doi: 10.1038/nrn1888
- 738 Barak, O., Rigotti, M., & Fusi, S. (2013). The Sparseness of Mixed Selectivity Neurons Controls  
739 the Generalization-Discrimination Trade-Off. *Journal of Neuroscience*, 33(9), 3844-3856. Re-  
740 trieved from <http://www.jneurosci.org/cgi/doi/10.1523/JNEUROSCI.2753-12.2013> doi: 10.1523/  
741 JNEUROSCI.2753-12.2013
- 742 Beaulieu, C., Kisvarday, Z., Somogyi, P., Cynader, M., & Cowey, A. (1992). Quantitative distribution of  
743 gaba-immunopositive and-immunonegative neurons and synapses in the monkey striate cortex (area 17).  
744 *Cerebral Cortex*, 2(4), 295-309. Retrieved from [+http://dx.doi.org/10.1093/cercor/2.4.295](http://dx.doi.org/10.1093/cercor/2.4.295) doi:  
745 10.1093/cercor/2.4.295
- 746 Bell, A. J., & Sejnowski, T. J. (1997). The “independent components” of natural scenes are edge filters.  
747 *Vision Research*, 37(23), 3327 - 3338. Retrieved from [http://www.sciencedirect.com/science/](http://www.sciencedirect.com/science/article/pii/S0042698997001211)  
748 [article/pii/S0042698997001211](http://www.sciencedirect.com/science/article/pii/S0042698997001211) doi: [https://doi.org/10.1016/S0042-6989\(97\)00121-1](https://doi.org/10.1016/S0042-6989(97)00121-1)
- 749 Berkes, P., White, B., & Fiser, J. (2009). No evidence for active sparsification in the visual cortex. *Neural*  
750 *Information Processing Systems Foundation*, 22, 108-116.
- 751 Bienenstock, E. L., Cooper, L. N., & Munro, P. W. (1982). Theory for the development of neuron  
752 selectivity: orientation specificity and binocular interaction in visual cortex. *The Journal of Neuroscience*,  
753 2(1), 32-48. doi: 10.1371/journal.ppat.0020109

- 754 Bock, D. D., Lee, W.-C. A., Kerlin, A. M., Andermann, M. L., Hood, G., Wetzell, A. W., ... Reid, R. C.  
755 (2011, Mar 09). Network anatomy and in vivo physiology of visual cortical neurons. *Nature*, *471*, 177  
756 EP -. Retrieved from <http://dx.doi.org/10.1038/nature09802> (Article)
- 757 Caporale, N., & Dan, Y. (2008). Spike Timing-Dependent Plasticity: A Hebbian Learning Rule. *Annu.*  
758 *Rev. Neurosci*, *31*, 25–46. Retrieved from [www.annualreviews.org](http://www.annualreviews.org) doi: 10.1146/annurev.neuro.31  
759 .060407.125639
- 760 Carvalho, T. P., & Buonomano, D. V. (2009). Differential effects of excitatory and inhibitory plasticity  
761 on synaptically driven neuronal input-output functions. *Neuron*, *61*(5), 774 - 785. Retrieved from  
762 <http://www.sciencedirect.com/science/article/pii/S0896627309000804> doi: [https://doi.org/](https://doi.org/10.1016/j.neuron.2009.01.013)  
763 10.1016/j.neuron.2009.01.013
- 764 Clopath, C., Büsing, L., Vasilaki, E., & Gerstner, W. (2010). Connectivity reflects coding: a model of  
765 voltage-based stdp with homeostasis. *Nature Neuroscience*, *13*(3), 344–352. Retrieved from [http://](http://www.nature.com/doi/10.1038/nn.2479)  
766 [www.nature.com/doi/10.1038/nn.2479](http://www.nature.com/doi/10.1038/nn.2479) doi: 10.1038/nn.2479
- 767 Cossell, L., Iacaruso, M. F., Muir, D. R., Houlton, R., Sader, E. N., Ko, H., ... Mrsic-flogel, T. D. (2015).  
768 Functional organization of excitatory synaptic strength in primary visual cortex. *Nature*, *000*(00), 1–5.  
769 doi: 10.1038/nature14182
- 770 Dadarlat, M. C., & Stryker, M. P. (2017). Locomotion enhances neural encoding of visual stimuli in  
771 mouse v1. *Journal of Neuroscience*, *37*(14), 3764–3775. Retrieved from [http://www.jneurosci.org/](http://www.jneurosci.org/content/37/14/3764)  
772 [content/37/14/3764](http://www.jneurosci.org/content/37/14/3764) doi: 10.1523/JNEUROSCI.2728-16.2017
- 773 D'Amour, J. A., & Froemke, R. C. R. (2015). Inhibitory and excitatory spike-  
774 timing-dependent plasticity in the auditory cortex. *Neuron*, *86*(2), 514–528. Re-  
775 trieved from <http://www.sciencedirect.com/science/article/pii/S089662731500210X>[http://](http://dx.doi.org/10.1016/j.neuron.2015.03.014)  
776 [dx.doi.org/10.1016/j.neuron.2015.03.014](http://dx.doi.org/10.1016/j.neuron.2015.03.014) doi: 10.1016/j.neuron.2015.03.014
- 777 Dayan, P., & Abbott, L. (2001). *Theoretical neuroscience*. MIT Press.
- 778 Denève, S., & Machens, C. K. (2016). Efficient codes and balanced networks. *Nature neuroscience*, *19*(3),  
779 375–82. Retrieved from <http://www.ncbi.nlm.nih.gov/pubmed/26906504> doi: 10.1038/nn.4243
- 780 Dorrn, A. L., Yuan, K., Barker, A. J., Schreiner, C. E., & Froemke, R. C. (2010). Developmental sensory  
781 experience balances cortical excitation and inhibition. *Nature*, *465*, 932–936. doi: 10.1038/nature09119
- 782 Ferster, D., & Miller, K. D. (2000). Neural mechanisms of orientation selectivity in the visual cortex.  
783 *Annual Review of Neuroscience*, *23*(1), 441–471. Retrieved from [https://doi.org/10.1146/annurev](https://doi.org/10.1146/annurev.neuro.23.1.441)  
784 [.neuro.23.1.441](https://doi.org/10.1146/annurev.neuro.23.1.441) (PMID: 10845071) doi: 10.1146/annurev.neuro.23.1.441

- 785 Finn, I. M., Priebe, N. J., & Ferster, D. (2007). The Emergence of Contrast-Invariant Orientation Tuning  
786 in Simple Cells of Cat Visual Cortex. *Neuron*, *54*(1), 137–152. doi: 10.1016/j.neuron.2007.02.029
- 787 Froemke, R. C. (2015). Plasticity of cortical excitatory-inhibitory balance. *Annual Review of Neuroscience*,  
788 *38*(1), 195–219. Retrieved from <https://doi.org/10.1146/annurev-neuro-071714-034002> (PMID:  
789 25897875) doi: 10.1146/annurev-neuro-071714-034002
- 790 Froemke, R. C., Merzenich, M. M., & Schreiner, C. E. (2007). A synaptic memory trace for cortical  
791 receptive field plasticity. *Nature*, *450*(7168), 425–429. Retrieved from [http://www.nature.com/  
792 doi/10.1038/nature06289](http://www.nature.com/doi/10.1038/nature06289) doi: 10.1038/nature06289
- 793 Froudarakis, E., Berens, P., Ecker, A. S., Cotton, R. J., Sinz, F. H., Yatsenko, D., ... Tolias, A. S.  
794 (2014). Population code in mouse v1 facilitates readout of natural scenes through increased sparseness.  
795 *Nature Neuroscience*, *17*(6), 851–7. Retrieved from <http://bethgelab.org/publications/120/> doi:  
796 10.1038/nn.3707
- 797 Gershon, E. D., Wiener, M. C., Latham, P. E., & RICHMOND, B. J. (1998). Coding strategies in monkey  
798 V1 and inferior temporal cortices. *Journal Of Neurophysiology*, *79*(3), 1135–1144. Retrieved from  
799 [papers3://publication/uuid/235E82AD-5CE2-4672-9E80-1F5B27476904](https://pubmed.ncbi.nlm.nih.gov/235E82AD-5CE2-4672-9E80-1F5B27476904) doi: 9497396
- 800 Gilbert, C. D., & Wiesel, T. (1990). The influence of contextual stimuli on the orientation selectivity  
801 of cells in primary visual cortex of the cat. *Vision research*, *30*(11), 1689–701. Retrieved from  
802 <http://www.ncbi.nlm.nih.gov/pubmed/2288084> doi: 10.1016/0042-6989(90)90153-C
- 803 Goris, R. L., Simoncelli, E. P., & Movshon, J. A. (2015). Origin and Function of Tuning Diversity  
804 in Macaque Visual Cortex. *Neuron*, *88*(4), 819–831. Retrieved from [http://dx.doi.org/10.1016/  
805 j.neuron.2015.10.009](http://dx.doi.org/10.1016/j.neuron.2015.10.009) doi: 10.1016/j.neuron.2015.10.009
- 806 Griffen, T., & Maffei, A. (2014). Gabaergic synapses: their plasticity and role in sensory cortex. *Frontiers  
807 in Cellular Neuroscience*, *8*, 91. Retrieved from [https://www.frontiersin.org/article/10.3389/  
808 fncel.2014.00091](https://www.frontiersin.org/article/10.3389/fncel.2014.00091) doi: 10.3389/fncel.2014.00091
- 809 Haider, B., Krause, M. R., Duque, A., Yu, Y., Touryan, J., Mazer, J. A., & McCormick, D. A. (2010).  
810 Synaptic and network mechanisms of sparse and reliable visual cortical activity during nonclassical  
811 receptive field stimulation. *Neuron*, *65*(1), 107 - 121. Retrieved from [http://www.sciencedirect.com/  
812 science/article/pii/S0896627309009829](http://www.sciencedirect.com/science/article/pii/S0896627309009829) doi: <https://doi.org/10.1016/j.neuron.2009.12.005>
- 813 Harris, K. D., & Mrsic-Flogel, T. D. (2013). Cortical connectivity and sensory coding. *Nature*, *503*, 51–58.  
814 doi: 10.1038/nature12654

- 815 Hennequin, G., Agnes, E. J., & Vogels, T. P. (2017). Inhibitory plasticity: Balance, control, and  
816 codependence. *Annual Review of Neuroscience*, *40*(1), 557-579. Retrieved from [https://doi.org/](https://doi.org/10.1146/annurev-neuro-072116-031005)  
817 [10.1146/annurev-neuro-072116-031005](https://doi.org/10.1146/annurev-neuro-072116-031005) (PMID: 28598717) doi: [10.1146/annurev-neuro-072116-](https://doi.org/10.1146/annurev-neuro-072116-031005)  
818 [-031005](https://doi.org/10.1146/annurev-neuro-072116-031005)
- 819 Hofer, S. B., Ko, H., Pichler, B., Vogelstein, J., Ros, H., Zeng, H., ... Mrsic-Flogel, T. D. (2011, Jul 17).  
820 Differential connectivity and response dynamics of excitatory and inhibitory neurons in visual cortex.  
821 *Nature Neuroscience*, *14*, 1045 EP -. Retrieved from <http://dx.doi.org/10.1038/nn.2876> (Article)
- 822 Hoyer, P. O. (2004). Non-negative Matrix Factorization with Sparseness Constraints. *The Journal of*  
823 *Machine Learning Research*, *5*, 1457-1469. doi: [10.1109/ICMLC.2011.6016966](https://doi.org/10.1109/ICMLC.2011.6016966)
- 824 Isaacson, J. S., & Scanziani, M. (2011). How inhibition shapes cortical activity. *Neuron*, *72*(2), 231-243.  
825 Retrieved from <http://dx.doi.org/10.1016/j.neuron.2011.09.027> doi: [10.1016/j.neuron.2011.09](https://doi.org/10.1016/j.neuron.2011.09.027)  
826 [.027](https://doi.org/10.1016/j.neuron.2011.09.027)
- 827 Jones, J. P., & Palmer, L. a. (1987a). An Evaluation of the Two-Dimensional Gabor Filter Model of  
828 Simple Receptive Fields in Cat Striate Cortex. *Journal of Neurophysiology*, *58*(6), 1233-1258. doi:  
829 [citeulike-article-id:762473](https://doi.org/10.1152/jn.1987.58.6.1187)
- 830 Jones, J. P., & Palmer, L. A. (1987b). The two-dimensional spatial structure of simple receptive fields in  
831 cat striate cortex. *Journal of Neurophysiology*, *58*(6), 1187-1211. Retrieved from [https://doi.org/](https://doi.org/10.1152/jn.1987.58.6.1187)  
832 [10.1152/jn.1987.58.6.1187](https://doi.org/10.1152/jn.1987.58.6.1187) (PMID: 3437330) doi: [10.1152/jn.1987.58.6.1187](https://doi.org/10.1152/jn.1987.58.6.1187)
- 833 Katzner, S., Busse, L., & Carandini, M. (2011). Gaba<sub>A</sub> inhibition controls response gain in visual cortex.  
834 *Journal of Neuroscience*, *31*(16), 5931-5941. Retrieved from [https://www.jneurosci.org/content/](https://www.jneurosci.org/content/31/16/5931)  
835 [31/16/5931](https://www.jneurosci.org/content/31/16/5931) doi: [10.1523/JNEUROSCI.5753-10.2011](https://doi.org/10.1523/JNEUROSCI.5753-10.2011)
- 836 Khan, A. G., Poort, J., Chadwick, A., Blot, A., Sahani, M., Mrsic-Flogel, T. D., & Hofer, S. B. (2018).  
837 Distinct learning-induced changes in stimulus selectivity and interactions of GABAergic interneuron  
838 classes in visual cortex. *Nature Neuroscience*, *21*(6), 851-859. Retrieved from [http://dx.doi.org/](http://dx.doi.org/10.1038/s41593-018-0143-z)  
839 [10.1038/s41593-018-0143-z](http://dx.doi.org/10.1038/s41593-018-0143-z) doi: [10.1038/s41593-018-0143-z](https://doi.org/10.1038/s41593-018-0143-z)
- 840 King, P. D., Zylberberg, J., & DeWeese, M. R. (2013). Inhibitory Interneurons Decorrelate Excitatory  
841 Cells to Drive Sparse Code formation in a Spiking Model of V1. *The Journal of Neuroscience*,  
842 *33*(13), 5475-5485. Retrieved from <http://www.ncbi.nlm.nih.gov/pubmed/23536063> doi:  
843 [10.1523/JNEUROSCI.4188-12.2013](https://doi.org/10.1523/JNEUROSCI.4188-12.2013)
- 844 Ko, H., Hofer, S., Pichler, B., Buchanan, K., Sjöström, P., & Mrsic-Flogel, T. (2011, 05). Functional  
845 specificity of local connections in neocortical networks. *Nature*, *473*, 87-91.

- 846 Kremkow, J., Perrinet, L. U., Monier, C., Alonso, J.-M., Aertsen, A., Frégnac, Y., & Masson, G. S.  
847 (2016). Push-Pull Receptive Field Organization and Synaptic Depression: Mechanisms for Reliably  
848 Encoding Naturalistic Stimuli in V1. *Frontiers in Neural Circuits*, 10(May), 37. Retrieved from  
849 <http://journal.frontiersin.org/Article/10.3389/fncir.2016.00037/abstract> doi: 10.3389/  
850 fncir.2016.00037
- 851 Kullmann, D. M., Moreau, A. W., Bakiri, Y., & Nicholson, E. (2012). Plasticity of Inhibition. *Neuron*,  
852 75(6), 951–962. Retrieved from <http://dx.doi.org/10.1016/j.neuron.2012.07.030> doi: 10.1016/  
853 j.neuron.2012.07.030
- 854 Larisch, R. (2019, November). [Re] Connectivity reflects coding a model of voltage-based STDP with  
855 homeostasis. *ReScience C*, 5(3). Retrieved from <https://doi.org/10.5281/zenodo.3538217> doi:  
856 10.5281/zenodo.3538217
- 857 Litwin-Kumar, A., & Doiron, B. (2014). Formation and maintenance of neuronal assemblies through  
858 synaptic plasticity. *Nature Communications*, 5(May), 1–12. Retrieved from [http://dx.doi.org/](http://dx.doi.org/10.1038/ncomms6319)  
859 10.1038/ncomms6319 doi: 10.1038/ncomms6319
- 860 Liu, B.-h., Li, Y.-t., Ma, W.-p., Pan, C.-j., Zhang, L. I., & Tao, H. W. (2011). Broad inhibition  
861 sharpens orientation selectivity by expanding input dynamic range in mouse simple cells. *Neuron*,  
862 71(3), 542–554. Retrieved from <http://dx.doi.org/10.1016/j.neuron.2011.06.017> doi: 10.1016/  
863 j.neuron.2011.06.017
- 864 Markram, H., Toledo-Rodriguez, M., Wang, Y., Gupta, A., Silberberg, G., & Wu, C. (2004). Interneurons  
865 of the neocortical inhibitory system. *Nature reviews. Neuroscience*, 5(10), 793–807. Retrieved from  
866 <http://dx.doi.org/10.1038/nrn1519> doi: 10.1038/nrn1519
- 867 Miconi, T., McKinstry, J. L., & Edelman, G. M. (2016). Spontaneous emergence of fast attrac-  
868 tor dynamics in a model of developing primary visual cortex. *Nat Commun*, 7, 13208. Re-  
869 trieved from <https://www.ncbi.nlm.nih.gov/pubmed/27796298>{%}5Cn[https://www.ncbi.nlm.nih](https://www.ncbi.nlm.nih.gov/pmc/articles/PMC5095518/pdf/ncomms13208.pdf)  
870 [.gov/pmc/articles/PMC5095518/pdf/ncomms13208.pdf](https://www.ncbi.nlm.nih.gov/pmc/articles/PMC5095518/pdf/ncomms13208.pdf) doi: 10.1038/ncomms13208
- 871 Mitchell, S. J., & Silver, R. (2003). Shunting inhibition modulates neuronal gain during synaptic excitation.  
872 *Neuron*, 38(3), 433 - 445. Retrieved from [http://www.sciencedirect.com/science/article/pii/](http://www.sciencedirect.com/science/article/pii/S0896627303002009)  
873 S0896627303002009 doi: [https://doi.org/10.1016/S0896-6273\(03\)00200-9](https://doi.org/10.1016/S0896-6273(03)00200-9)
- 874 Mongillo, G., & Loewenstein, Y. (2018). Inhibitory connectivity defines the realm of excitatory plasticity.  
875 *Nature Neuroscience*, 21(January), 1463 – 1470. doi: 10.1038/s41593-018-0226-x

- 876 Niell, C. M., & Stryker, M. P. (2008). Highly selective receptive fields in mouse visual cortex. *Journal of*  
877 *Neuroscience*, 28(30), 7520–7536. Retrieved from <https://www.jneurosci.org/content/28/30/7520>  
878 doi: 10.1523/JNEUROSCI.0623-08.2008
- 879 Olshausen, B. A., & Field, D. J. (1996). Emergence of simple-cell receptive field properties by learning  
880 a sparse code for natural images. *Nature*, 381(6583), 607–609. Retrieved from [http://dx.doi.org/](http://dx.doi.org/10.1038/381607a0)  
881 [10.1038/381607a0](http://dx.doi.org/10.1038/381607a0) doi: 10.1038/381607a0
- 882 Olshausen, B. A., & Field, D. J. (1997). Sparse coding with an overcomplete basis set: A strategy  
883 employed by V1? *Vision Research*, 37(23), 3311–3325. doi: 10.1016/S0042-6989(97)00169-7
- 884 Paille, V., Fino, E., Du, K., Morera-Herreras, T., Perez, S., Kotaleski, J. H., & Venance, L. (2013).  
885 Gabaergic circuits control spike-timing-dependent plasticity. *Journal of Neuroscience*, 33(22), 9353–9363.  
886 Retrieved from <https://www.jneurosci.org/content/33/22/9353> doi: 10.1523/JNEUROSCI.5796  
887 -12.2013
- 888 Pillow, J. W., & Simoncelli, E. P. (2006). Dimensionality reduction in neural models: an information-  
889 theoretic generalization of spike-triggered average and covariance analysis. *Journal of vision*, 6(4),  
890 414–428. doi: 10.1167/6.4.9
- 891 Potjans, T. C., & Diesmann, M. (2014). The Cell-Type Specific Cortical Microcircuit: Relating  
892 Structure and Activity in a Full-Scale Spiking Network Model. *Cerebral Cortex*(March), 785–806. doi:  
893 10.1093/cercor/bhs358
- 894 Priebe, N. J. (2016). Mechanisms of Orientation Selectivity in the Primary Visual Cortex. *Annual Review*  
895 *of Vision Science*, 2(1), 85–107. Retrieved from [http://www.annualreviews.org/doi/10.1146/](http://www.annualreviews.org/doi/10.1146/annurev-vision-111815-114456)  
896 [annurev-vision-111815-114456](http://www.annualreviews.org/doi/10.1146/annurev-vision-111815-114456) doi: 10.1146/annurev-vision-111815-114456
- 897 Priebe, N. J., & Ferster, D. (2008). Inhibition, Spike Threshold, and Stimulus Selectivity in Primary  
898 Visual Cortex. *Neuron*, 57(4), 482–497. doi: 10.1016/j.neuron.2008.02.005
- 899 Ringach, D. L. (2002). Spatial Structure and Symmetry of Simple-Cell Receptive Fields in Macaque  
900 Primary Visual Cortex. *Journal of Neurophysiology*, 88(1), 455–463. Retrieved from [http://www.ncbi](http://www.ncbi.nlm.nih.gov/pubmed/12091567)  
901 [.nlm.nih.gov/pubmed/12091567](http://www.ncbi.nlm.nih.gov/pubmed/12091567) doi: 10.1152/jn.00881.2001
- 902 Ringach, D. L., & Shapley, R. (2004). Reverse correlation in neurophysiology. *Cognitive Science*, 28(2),  
903 147–166. doi: 10.1016/j.cogsci.2003.11.003
- 904 Ringach, D. L., Shapley, R. M., & Hawken, M. J. (2002). Orientation selectivity in macaque v1:  
905 Diversity and laminar dependence. *Journal of Neuroscience*, 22(13), 5639–5651. Retrieved from  
906 <https://www.jneurosci.org/content/22/13/5639> doi: 10.1523/JNEUROSCI.22-13-05639.2002

- 907 Rolls, E. T., & Tovee, M. J. (1995). Sparseness of the Neuronal Representation of Stimuli in the  
908 Primate Temporal Visual Cortex. *Journal of Neurophysiology*, *73*(2), 713–726. Retrieved from  
909 <http://www.ncbi.nlm.nih.gov/pubmed/7760130>
- 910 Sadagopan, S., & Ferster, D. (2012). Feedforward Origins of Response Variability Underlying Contrast  
911 Invariant Orientation Tuning in Cat Visual Cortex. *Neuron*, *74*(5), 911–923. Retrieved from [http://](http://dx.doi.org/10.1016/j.neuron.2012.05.007)  
912 [dx.doi.org/10.1016/j.neuron.2012.05.007](http://dx.doi.org/10.1016/j.neuron.2012.05.007) doi: 10.1016/j.neuron.2012.05.007
- 913 Sadeh, S., Cardanobile, S., & Rotter, S. (2014). Mean-field analysis of orientation selectivity in  
914 inhibition-dominated networks of spiking neurons. *SpringerPlus*, *3*(1), 148. Retrieved from [http://](http://www.springerplus.com/content/3/1/148)  
915 [www.springerplus.com/content/3/1/148](http://www.springerplus.com/content/3/1/148) doi: 10.1186/2193-1801-3-148
- 916 Sadeh, S., Clopath, C., & Rotter, S. (2015). Emergence of Functional Specificity in Balanced Networks  
917 with Synaptic Plasticity. *PLoS Computational Biology*, *11*(6), 1–27. doi: 10.1371/journal.pcbi.1004307
- 918 Savin, C., Joshi, P., & Triesch, J. (2010). Independent Component Analysis in Spiking Neurons. *PLoS*  
919 *Comput Biol*, *6*(4), e1000757. doi: 10.1371/journal.pcbi.1000757
- 920 Schwartz, O., Pillow, J. W., Rust, N. C., & Simoncelli, E. P. (2006). Spike-triggered neural characteriza-  
921 tion. *Journal of Vision*, *6*, *6*(4), 484–507. Retrieved from [http://www.ncbi.nlm.nih.gov/pubmed/](http://www.ncbi.nlm.nih.gov/pubmed/16889482)  
922 [16889482](http://www.ncbi.nlm.nih.gov/pubmed/16889482) doi: 10.1167/6.4.13
- 923 Sengupta, B., Laughlin, S. B., & Niven, J. E. (2013). Balanced Excitatory and Inhibitory Synaptic  
924 Currents Promote Efficient Coding and Metabolic Efficiency. *PLoS Computational Biology*, *9*(10). doi:  
925 10.1371/journal.pcbi.1003263
- 926 Shadlen, M. N., & Newsome, W. T. (1998). The variable discharge of cortical neurons: implications for  
927 connectivity, computation, and information coding. *The Journal of neuroscience : the official journal*  
928 *of the Society for Neuroscience*, *18*(10), 3870–96. Retrieved from [http://www.ncbi.nlm.nih.gov/](http://www.ncbi.nlm.nih.gov/pubmed/9570816)  
929 [pubmed/9570816](http://www.ncbi.nlm.nih.gov/pubmed/9570816) doi: 0270-6474/98/183870-27\$05.00/0
- 930 Skottun, B. C., Bradley, A., Sclar, G., Ohzawa, I., & Freeman, R. D. (1987). The effects of contrast  
931 on visual orientation and spatial frequency discrimination: a comparison of single cells and behavior.  
932 *Journal of Neurophysiology*, *57*(3), 773–786. doi: 10.1109/ACSAC.2009.36
- 933 Smith, M. A., & Kohn, A. (2008). Spatial and temporal scales of neuronal correlation in primary visual  
934 cortex. *The Journal of Neuroscience*, *28*(48), 12591–603. Retrieved from [http://www.jneurosci.org/](http://www.jneurosci.org/content/28/48/12591.abstract)  
935 [content/28/48/12591.abstract](http://www.jneurosci.org/content/28/48/12591.abstract) doi: 10.1523/JNEUROSCI.2929-08.2008
- 936 Spanne, A., & Jörntell, H. (2015). Questioning the role of sparse coding in the brain. *Trends in*  
937 *Neurosciences*, *38*(7), 417–427. doi: 10.1016/j.tins.2015.05.005

- 938 Spratling, M. W. (2012). Unsupervised learning of generative and discriminative weights encoding  
939 elementary image components in a predictive coding model of cortical function. *Neural Computation*,  
940 *24*(1), 60–103.
- 941 Sprekeler, H. (2017). Functional consequences of inhibitory plasticity: homeostasis, the excitation-  
942 inhibition balance and beyond. *Current Opinion in Neurobiology*, *43*, 198–203. Retrieved from  
943 <http://www.ncbi.nlm.nih.gov/pubmed/28500933> doi: 10.1016/j.conb.2017.03.014
- 944 Srinivasa, N., & Jiang, Q. (2013). Stable learning of functional maps in self-organizing spiking  
945 neural networks with continuous synaptic plasticity. *Frontiers in Computational Neuroscience*,  
946 *7*, 10. Retrieved from <https://www.frontiersin.org/article/10.3389/fncom.2013.00010> doi:  
947 10.3389/fncom.2013.00010
- 948 Stringer, C., Pachitariu, M., Steinmetz, N. A., Okun, M., Bartho, P., Harris, K. D., ... Lesica, N. A.  
949 (2016, dec). Inhibitory control of correlated intrinsic variability in cortical networks. *eLife*, *5*, e19695.  
950 Retrieved from <https://doi.org/10.7554/eLife.19695> doi: 10.7554/eLife.19695
- 951 Tao, L., Shelley, M., McLaughlin, D., & Shapley, R. (2004). An egalitarian network model for the  
952 emergence of simple and complex cells in visual cortex. *Proceedings of the National Academy of Sciences*,  
953 *101*(1), 366–371. Retrieved from <http://www.pnas.org/cgi/doi/10.1073/pnas.2036460100> doi:  
954 10.1073/pnas.2036460100
- 955 Tolhurst, D. J., Smyth, D., & Thompson, I. D. (2009). The sparseness of neuronal responses in  
956 ferret primary visual cortex. *Journal of Neuroscience*, *29*(8), 2355–2370. Retrieved from [https://](https://www.jneurosci.org/content/29/8/2355)  
957 [www.jneurosci.org/content/29/8/2355](https://www.jneurosci.org/content/29/8/2355) doi: 10.1523/JNEUROSCI.3869-08.2009
- 958 Troyer, T. W., Krukowski, a. E., Priebe, N. J., & Miller, K. D. (1998). Contrast-invariant orientation  
959 tuning in cat visual cortex: thalamocortical input tuning and correlation-based intracortical connectivity.  
960 *Journal of Neuroscience*, *18*(15), 5908–5927.
- 961 Vinje, W. E., & Gallant, J. L. (2000). Sparse coding and decorrelation in primary visual cortex during  
962 natural vision. *Science*, *287*(5456), 1273–1276. Retrieved from [http://science.sciencemag.org/](http://science.sciencemag.org/content/287/5456/1273)  
963 [content/287/5456/1273](http://science.sciencemag.org/content/287/5456/1273) doi: 10.1126/science.287.5456.1273
- 964 Vinje, W. E., & Gallant, J. L. (2002). Natural stimulation of the nonclassical receptive field increases  
965 information transmission efficiency in v1. *Journal of Neuroscience*, *22*(7), 2904–2915. Retrieved from  
966 <https://www.jneurosci.org/content/22/7/2904> doi: 10.1523/JNEUROSCI.22-07-02904.2002
- 967 Vitay, J., Dinkelbach, H., & Hamker, F. (2015). Annarchy: a code generation approach to neural  
968 simulations on parallel hardware. *Frontiers in Neuroinformatics*, *9*, 19. Retrieved from [https://](https://www.frontiersin.org/article/10.3389/fninf.2015.00019)  
969 [www.frontiersin.org/article/10.3389/fninf.2015.00019](https://www.frontiersin.org/article/10.3389/fninf.2015.00019) doi: 10.3389/fninf.2015.00019



- 970 Vogels, T. P., Rajan, K., & Abbott, L. (2005). Neural Network Dynamics. *Annual Review of Neuroscience*,  
971 28(1), 357–376. Retrieved from <http://www.annualreviews.org/doi/10.1146/annurev.neuro.28>  
972 .061604.135637 doi: 10.1146/annurev.neuro.28.061604.135637
- 973 Vogels, T. P., Sprekeler, H., Zenke, F., Clopath, C., & Gerstner, W. (2011). Inhibitory Plasticity Balances  
974 Excitation and Inhibition in Sensory Pathways and Memory Networks. *Science*, 334(6062), 1569–  
975 1573. Retrieved from <http://science.sciencemag.org/content/334/6062/1569.abstract> doi:  
976 10.1126/science.1211095
- 977 Wang, L., & Maffei, A. (2014). Inhibitory Plasticity Dictates the Sign of Plasticity at Excitatory Synapses.  
978 *Journal of Neuroscience*, 34(4), 1083–1093. Retrieved from <http://www.jneurosci.org/cgi/doi/>  
979 10.1523/JNEUROSCI.4711-13.2014 doi: 10.1523/JNEUROSCI.4711-13.2014
- 980 Weliky, M., Fiser, J., Hunt, R. H., & Wagner, D. N. (2003). Coding of natural scenes in primary visual  
981 cortex. *Neuron*, 37(4), 703–18. Retrieved from <http://www.ncbi.nlm.nih.gov/pubmed/12597866>  
982 doi: 10.1016/S0896-6273(03)00022-9
- 983 Wilson, N. R., Runyan, C. A., Wang, F. L., & Sur, M. (2012). Division and subtraction by distinct  
984 cortical inhibitory networks in vivo. *Nature*, 488(7411), 343–348. Retrieved from <http://dx.doi.org/>  
985 10.1038/nature11347 doi: 10.1038/nature11347
- 986 Wiltschut, J., & Hamker, F. H. (2009). Efficient coding correlates with spatial frequency tuning in  
987 a model of V1 receptive field organization. *Visual Neuroscience*, 26(1), 21–34. Retrieved from  
988 <http://www.ncbi.nlm.nih.gov/pubmed/19203427> doi: 10.1017/S0952523808080966
- 989 Zenke, F., & Gerstner, W. (2017). Hebbian plasticity requires compensatory processes on multiple  
990 timescales. *Philosophical Transactions of the Royal Society B: Biological Sciences*, 372(1715), 20160259.  
991 Retrieved from <http://rstb.royalsocietypublishing.org/lookup/doi/10.1098/rstb.2016.0259>  
992 doi: 10.1098/rstb.2016.0259
- 993 Zhu, W., Shelley, M., & Shapley, R. (2009). A neuronal network model of primary visual cortex  
994 explains spatial frequency selectivity. *Journal of Computational Neuroscience*, 26(2), 271–287. doi:  
995 10.1007/s10827-008-0110-x
- 996 Zhu, W., Xing, D., Shelley, M., & Shapley, R. (2010). Correlation between spatial frequency and orientation  
997 selectivity in V1 cortex: Implications of a network model. *Vision Research*, 50(22), 2261–2273. Retrieved  
998 from <http://dx.doi.org/10.1016/j.visres.2010.01.007> doi: 10.1016/j.visres.2010.01.007
- 999 Zhu, Y., Qiao, W., Liu, K., Zhong, H., & Yao, H. (2015). Control of response reliability by parvalbumin-  
1000 expressing interneurons in visual cortex. *Nature Communications*, 6, 1–11. Retrieved from <http://>  
1001 [dx.doi.org/10.1038/ncomms7802](http://dx.doi.org/10.1038/ncomms7802) doi: 10.1038/ncomms7802

- 1002 Znamenskiy, P., Kim, M.-H., Muir, D. R., Iacaruso, M. F., Hofer, S. B., & Mrsic-Flogel, T. D. (2018).  
1003 Functional selectivity and specific connectivity of inhibitory neurons in primary visual cortex. *bioRxiv*.  
1004 Retrieved from <https://www.biorxiv.org/content/early/2018/04/04/294835.1> doi: 10.1101/  
1005 294835
- 1006 Zylberberg, J., & DeWeese, M. R. (2013). Sparse Coding Models Can Exhibit Decreasing Sparseness  
1007 while Learning Sparse Codes for Natural Images. *PLoS Computational Biology*, 9(8). doi: 10.1371/  
1008 journal.pcbi.1003182
- 1009 Zylberberg, J., Murphy, J. T., & DeWeese, M. R. (2011). A Sparse Coding Model with Synaptically Local  
1010 Plasticity and Spiking Neurons Can Account for the Diverse Shapes of V1 Simple Cell Receptive Fields.  
1011 *PLoS Comput Biol*, 7(10), e1002250. doi: 10.1371/journal.pcbi.1002250
